# Supplementary material
Source: Research Square preprint supplement (doi:10.21203/rs.3.rs-9356453/v1)
Supplement: Supplementary file 1 [file 8a9b05a3ebb01ab3f747354e.xlsx]

## Sheet: Sheet1
Genes	Coef
NOS1	0.7651
MYLK2	0.5645
MYO1D	0.2991
CAMK2N2	0.2878
SNTA1	-0.2173
CAMK2B	-0.3418
TBC1D4	-0.2671
TBC1D10C	-0.242
