# Supplementary material
Source: Research Square preprint supplement (doi:10.21203/rs.3.rs-9356453/v1)
Supplement: Supplementary file 6 [file 11a514dd76b2ad010973a0cd.pdf]

*DNAJC13* : [Somatic Mutation Rate: 1.39%]

NM\_015268

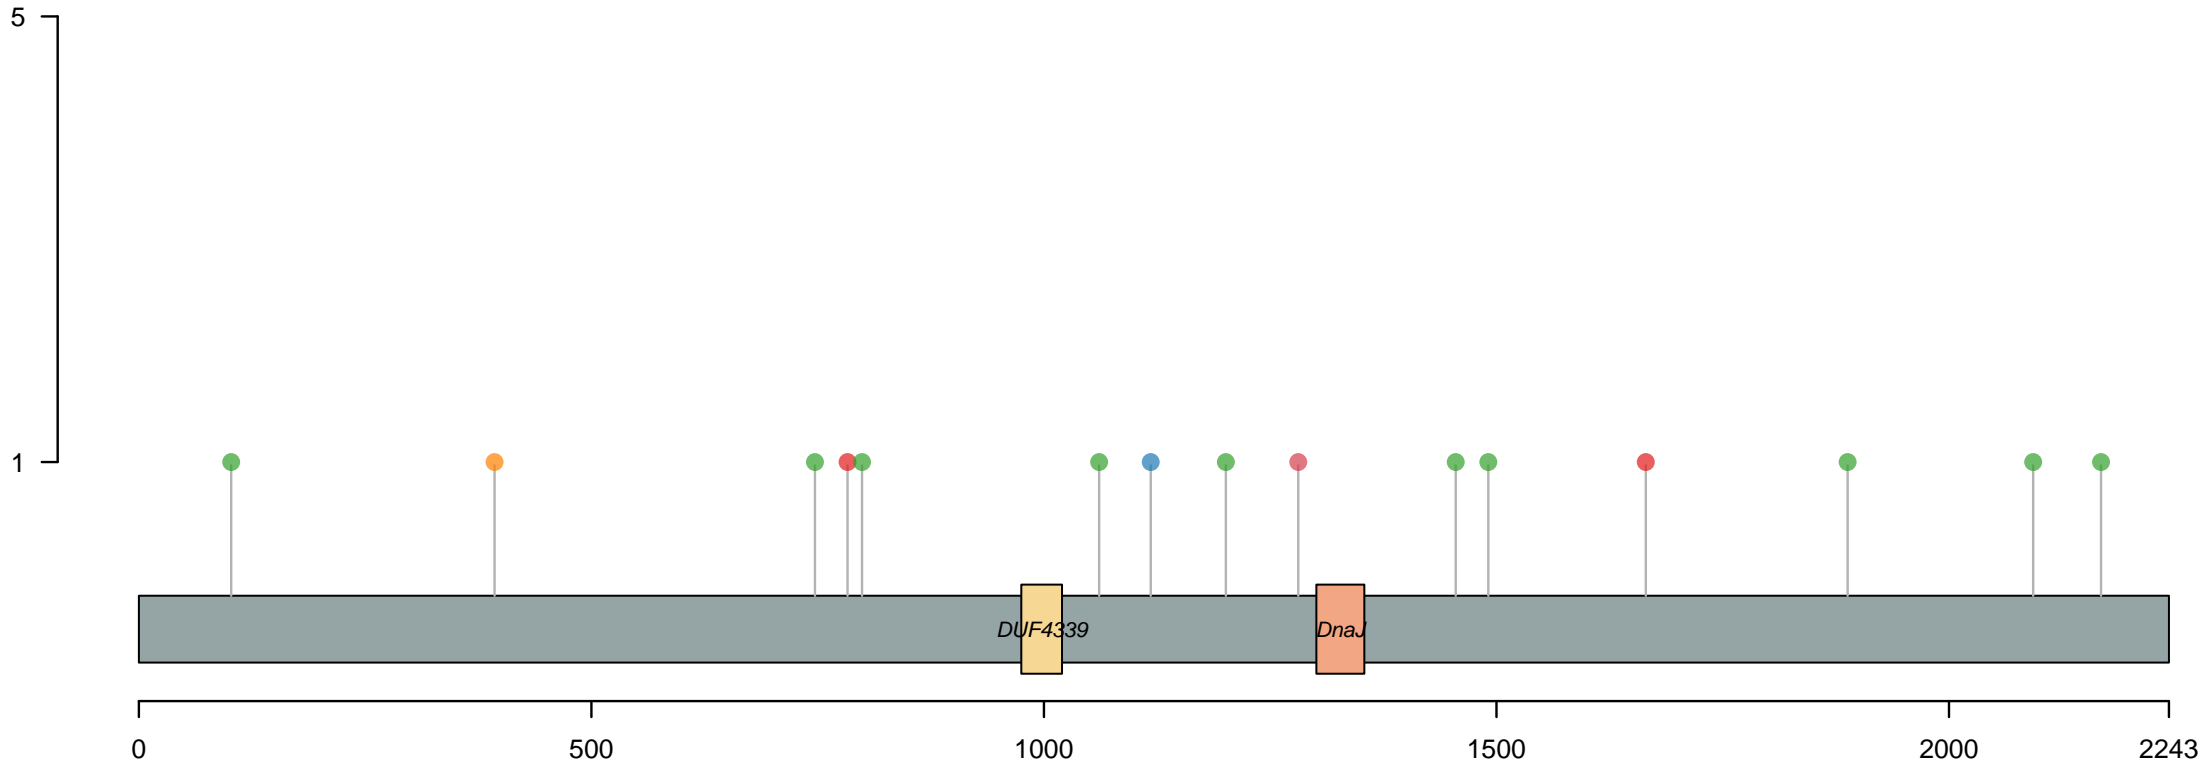

- Missense\_Mutation
- Splice\_Site
- Nonsense\_Mutation
- Frame\_Shift\_Del
- In\_Frame\_Ins
