# Supplementary material
Source: Research Square preprint supplement (doi:10.21203/rs.3.rs-9356453/v1)
Supplement: Supplementary file 9 [file 275f8ebf02afd4d95d02ffd6.pdf]

ZC3H13 : [Somatic Mutation Rate: 1.18%]  
NM\_015070

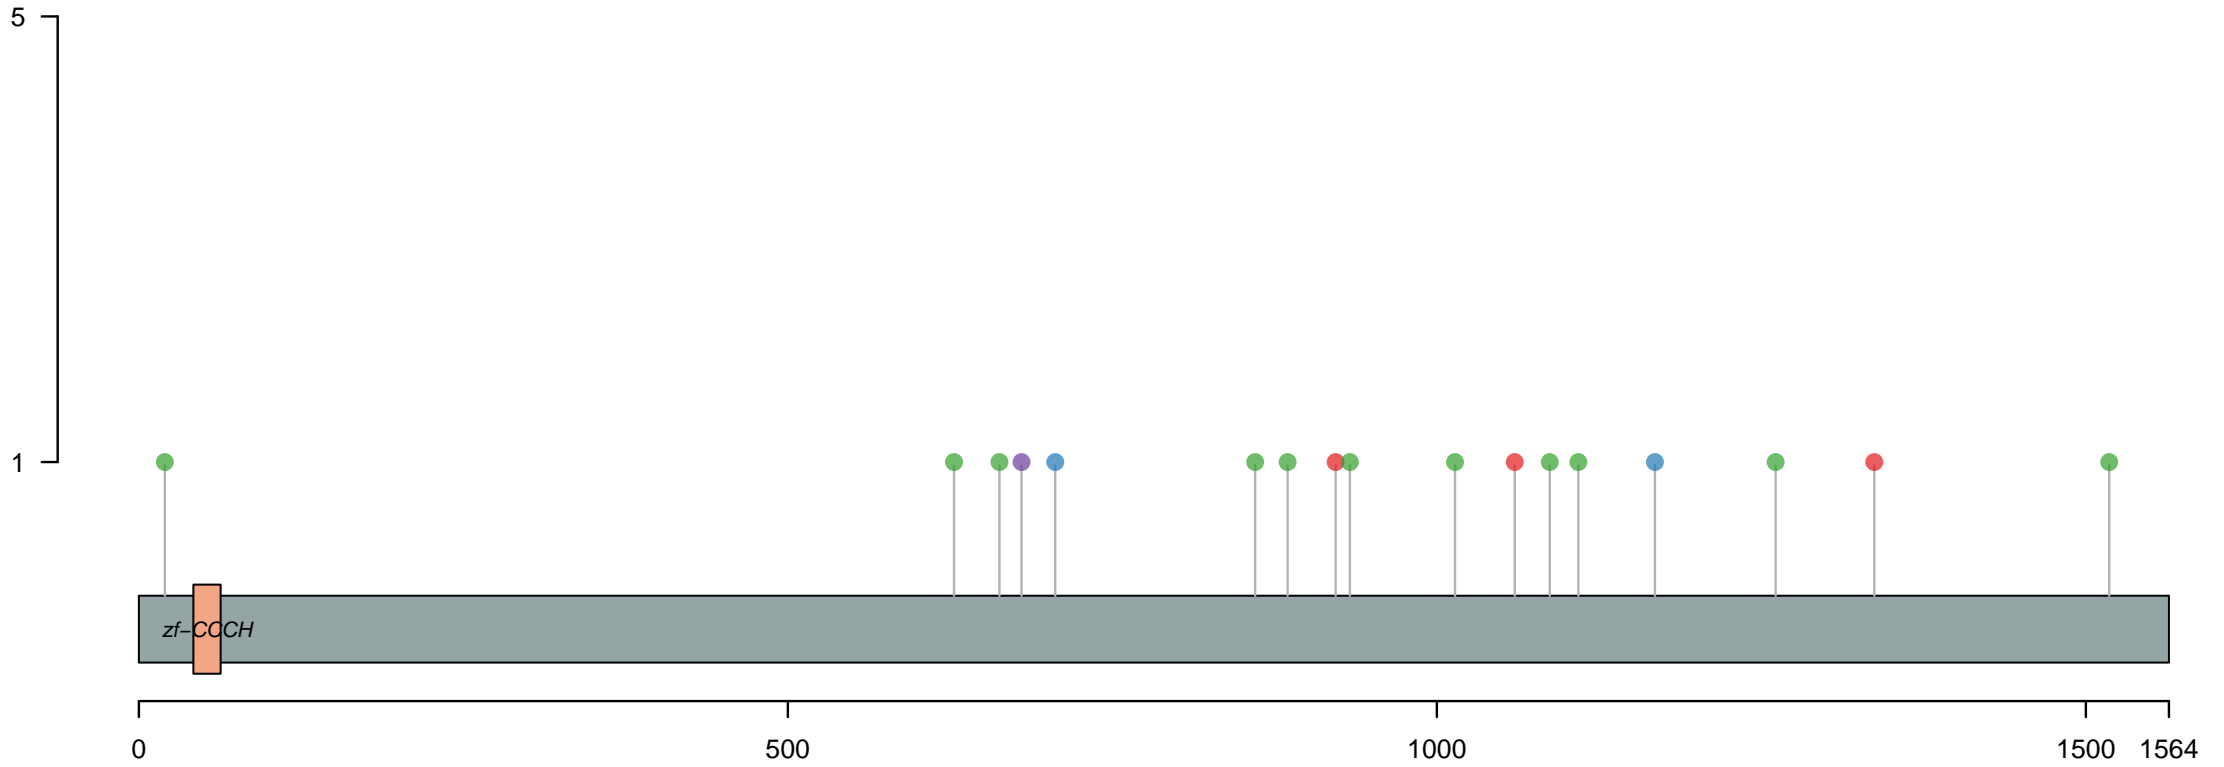

- Missense\_Mutation
- Frame\_Shift\_Ins
- Frame\_Shift\_Del
- Nonsense\_Mutation
