# Supplementary material
Source: Research Square preprint supplement (doi:10.21203/rs.3.rs-9356453/v1)
Supplement: Supplementary file 10 [file 2d20174ef1303ac9f2d33a5b.pdf]

CCDC88C : [Somatic Mutation Rate: 0.86%]

NM\_001080414

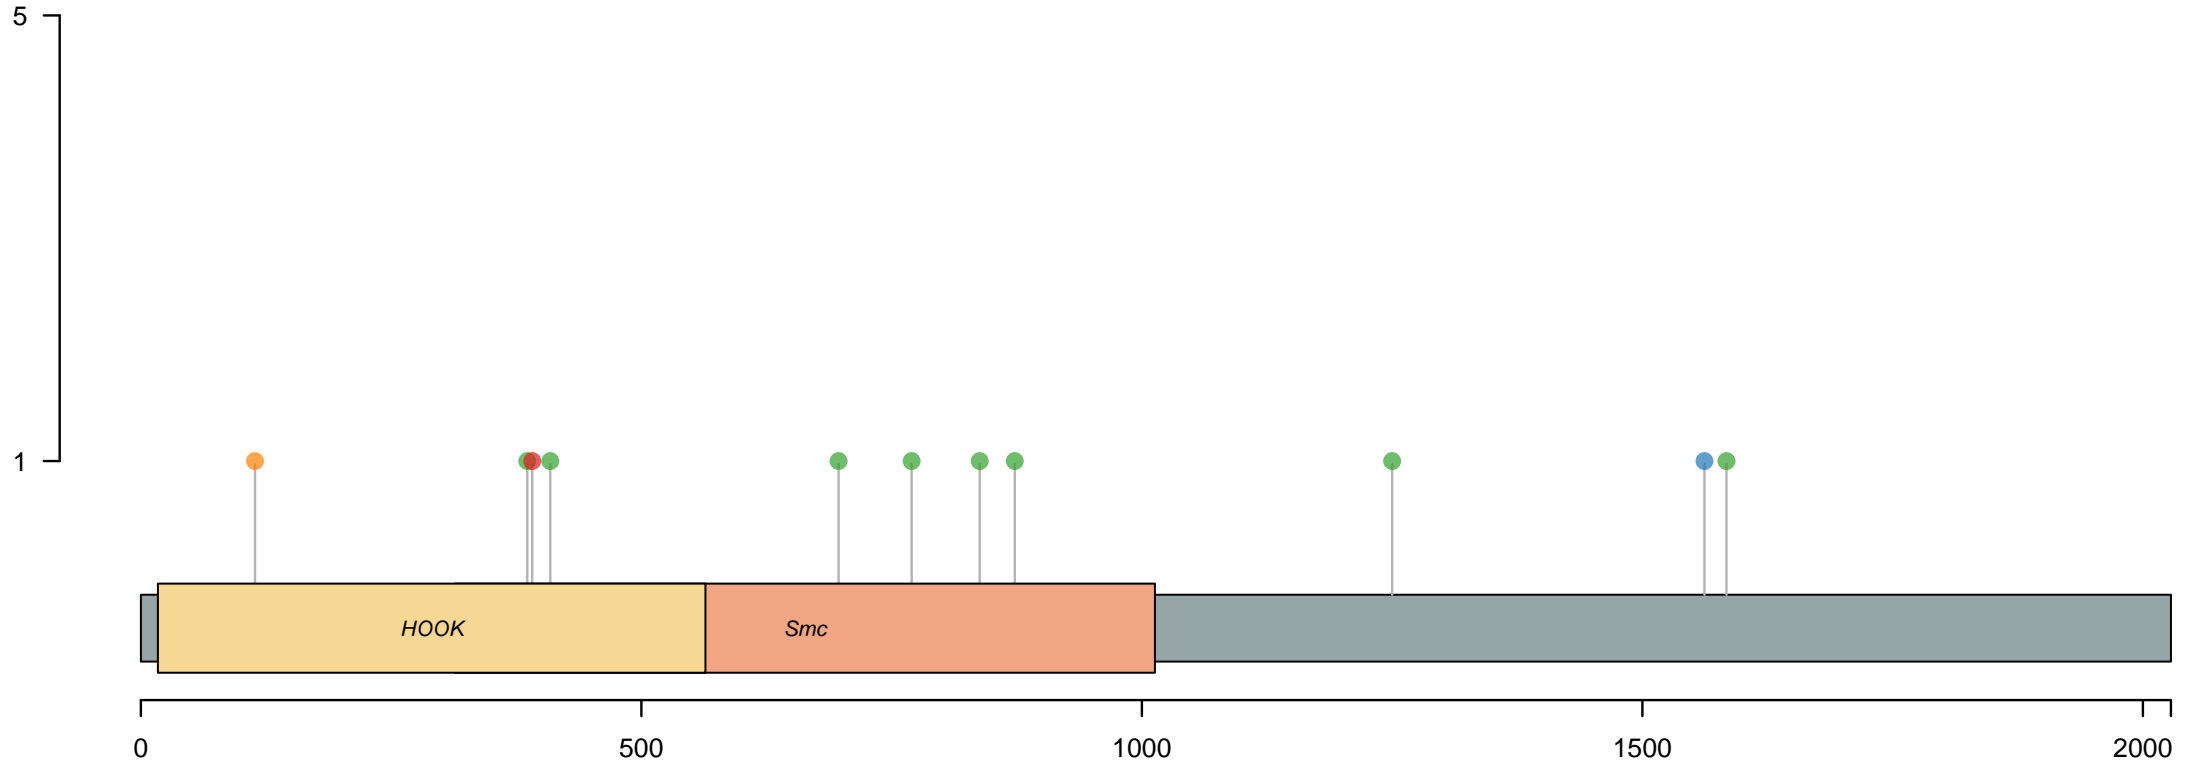

- Splice\_Site
- Missense\_Mutation
- Nonsense\_Mutation
- Frame\_Shift\_Del
