# Supplementary material
Source: Research Square preprint supplement (doi:10.21203/rs.3.rs-9356453/v1)
Supplement: Supplementary file 11 [file 31058d6808c301652d16c6d4.pdf]

LRP1 : [Somatic Mutation Rate: 2.68%]

NM\_002332

5

1

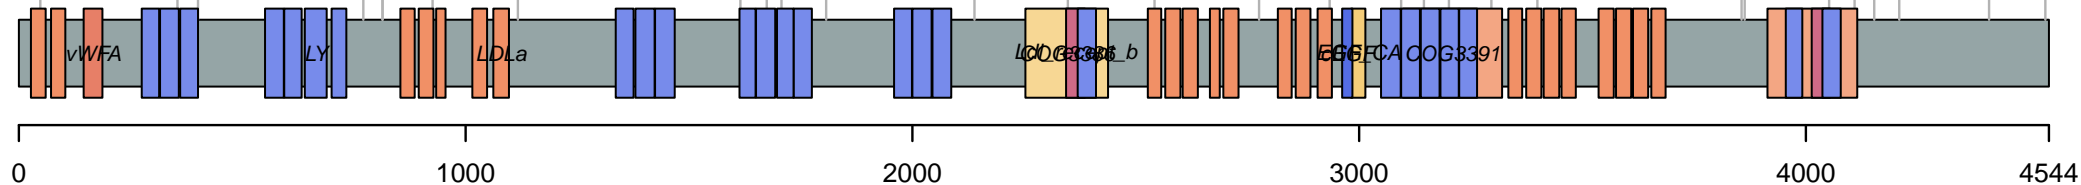

- Missense\_Mutation
- Nonsense\_Mutation
- Frame\_Shift\_Del
- Frame\_Shift\_Ins
