# Supplementary material
Source: Research Square preprint supplement (doi:10.21203/rs.3.rs-9356453/v1)
Supplement: Supplementary file 14 [file 43e0752c50f7cf58119673f1.pdf]

TTN : [Somatic Mutation Rate: 18.56%]

NM\_001267550

5

1

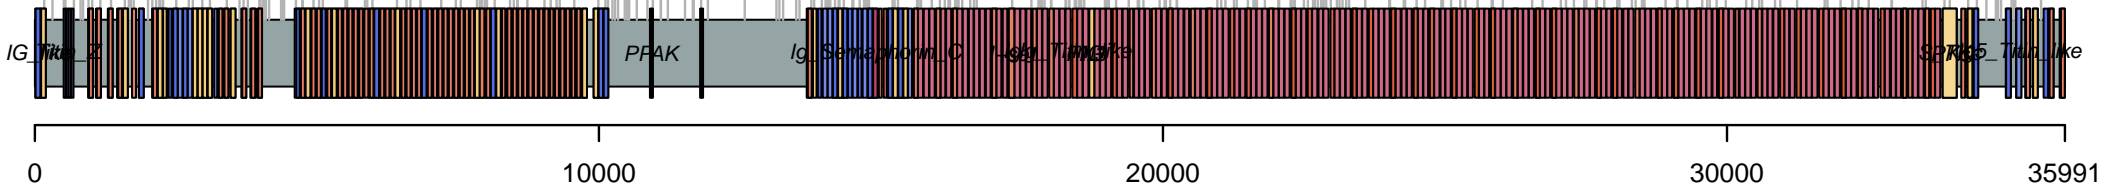

- Missense\_Mutation
- Frame\_Shift\_Del
- Splice\_Site
- In\_Frame\_Ins
- Nonsense\_Mutation
- In\_Frame\_Del
