# Supplementary material
Source: Research Square preprint supplement (doi:10.21203/rs.3.rs-9356453/v1)
Supplement: Supplementary file 15 [file 47f82a0e08480c37530bbd52.pdf]

THBS1 : [Somatic Mutation Rate: 1.07%]

NM\_003246

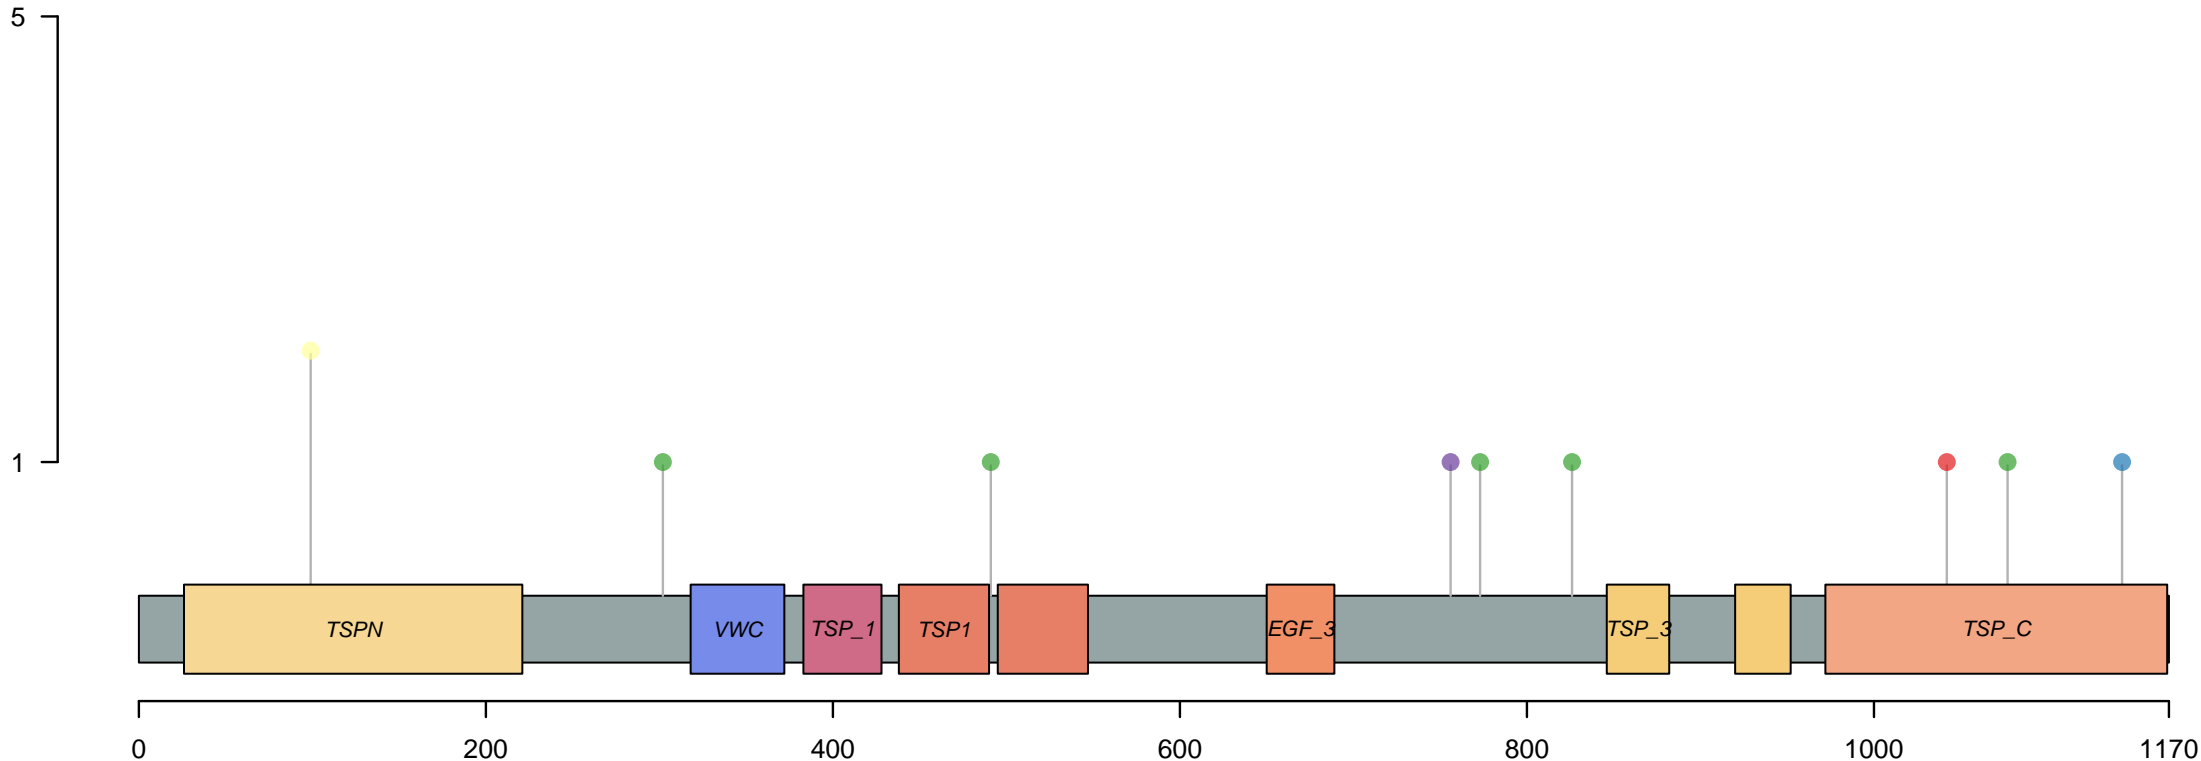

- In\_Frame\_Del
- Missense\_Mutation
- Frame\_Shift\_Ins
- Nonsense\_Mutation
- Frame\_Shift\_Del
