# Supplementary material
Source: Research Square preprint supplement (doi:10.21203/rs.3.rs-9356453/v1)
Supplement: Supplementary file 17 [file 494b06c108a7f2d471824ac8.pdf]

ASH1L : [Somatic Mutation Rate: 2.47%]

NM\_018489

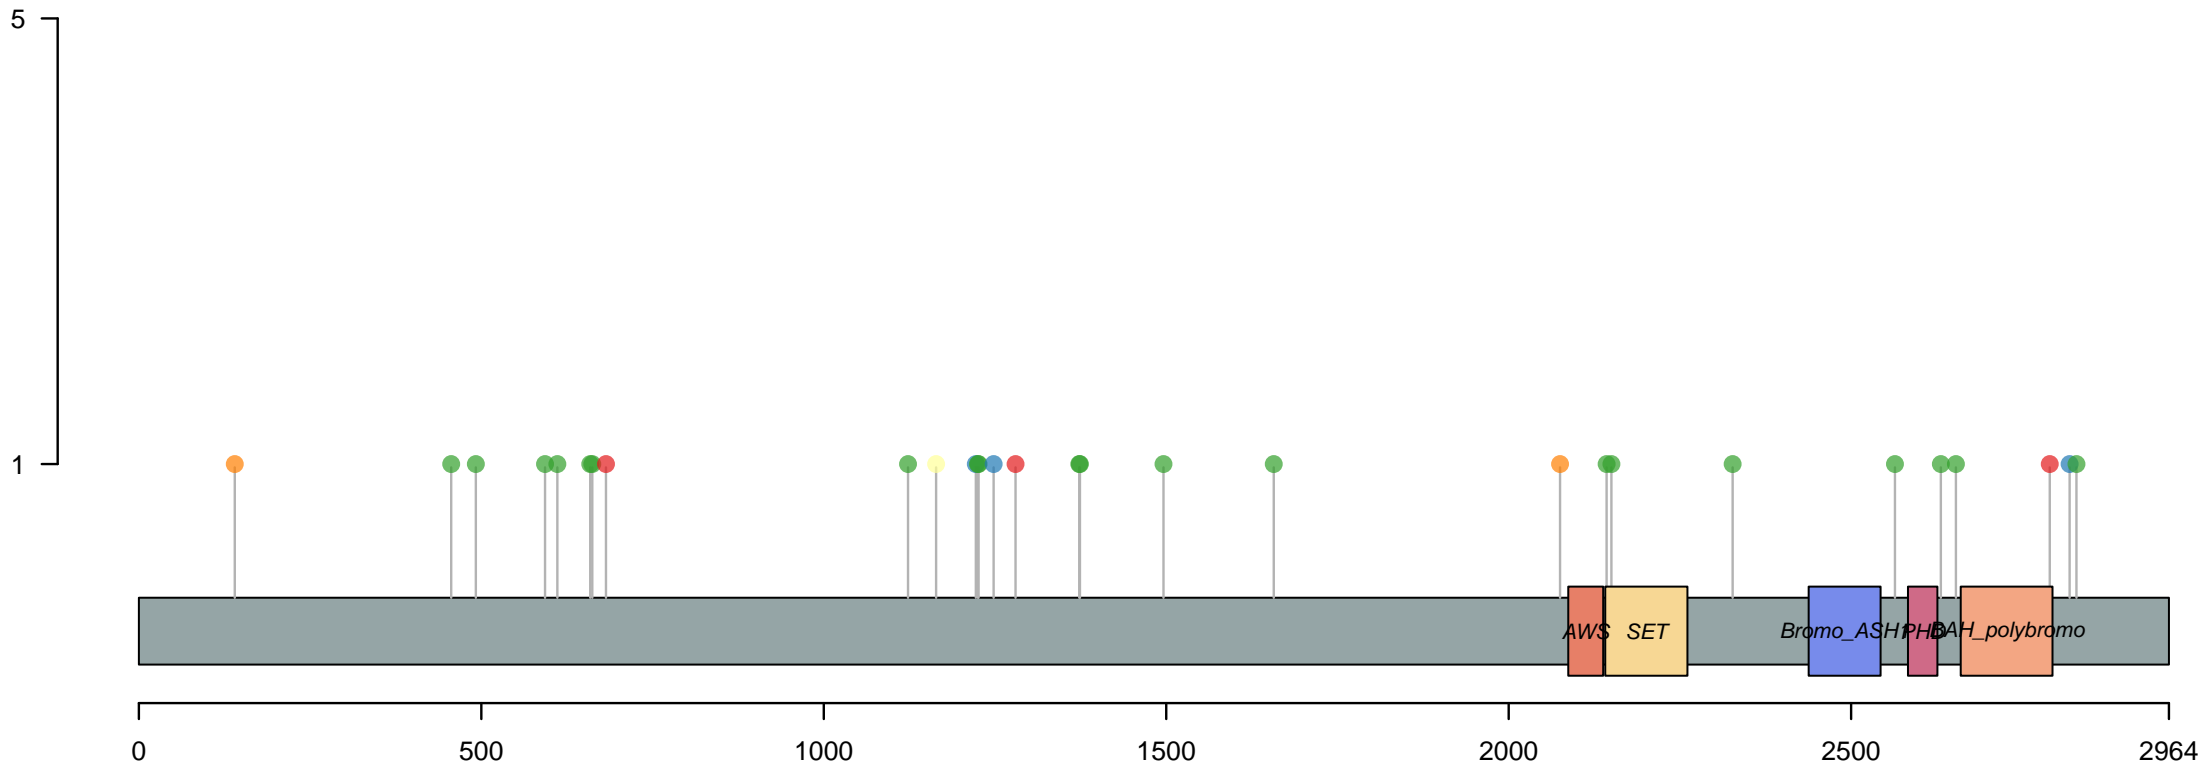

- Splice\_Site
- In\_Frame\_Del
- Missense\_Mutation
- Frame\_Shift\_Del
- Nonsense\_Mutation
