# Supplementary material
Source: Research Square preprint supplement (doi:10.21203/rs.3.rs-9356453/v1)
Supplement: Supplementary file 18 [file 4c90945227753fee4fe4f2d7.pdf]

OBSCN : [Somatic Mutation Rate: 4.29%]

NM\_001271223

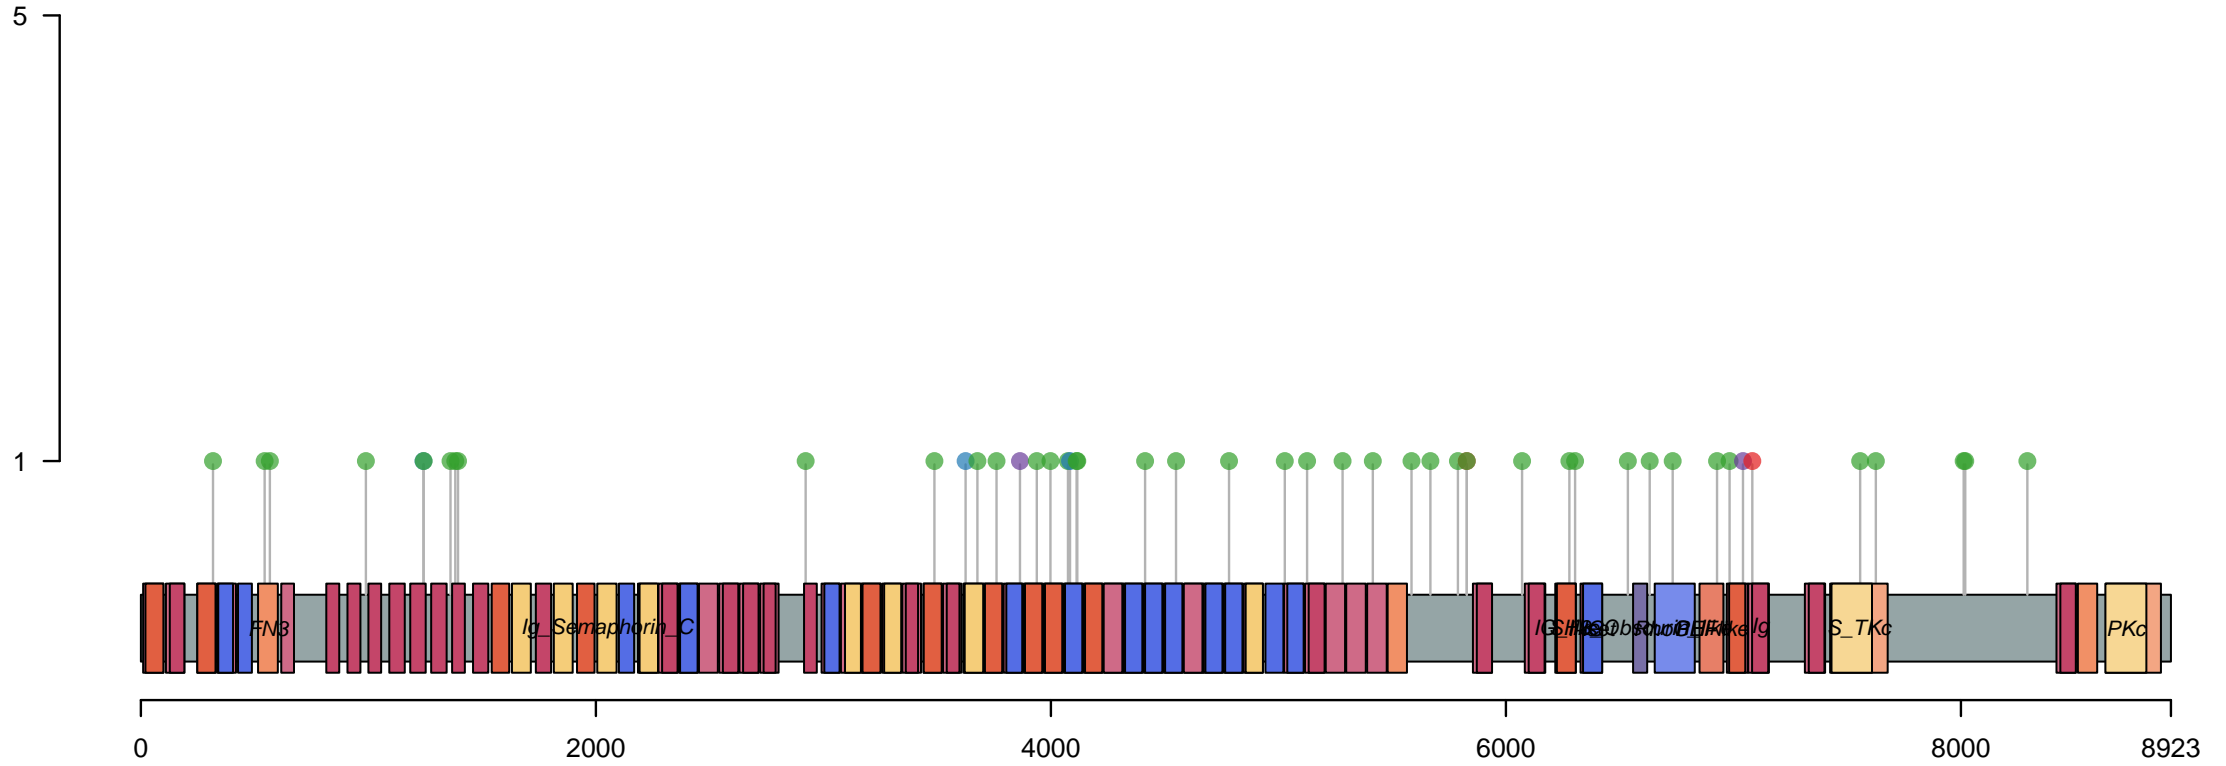

- Missense\_Mutation
- Frame\_Shift\_Del
- Frame\_Shift\_Ins
- Nonsense\_Mutation
