# Supplementary material
Source: Research Square preprint supplement (doi:10.21203/rs.3.rs-9356453/v1)
Supplement: Supplementary file 30 [file 988c3d4711326925f7f82c1e.pdf]

HMCN1 : [Somatic Mutation Rate: 6.22%]

NM\_031935

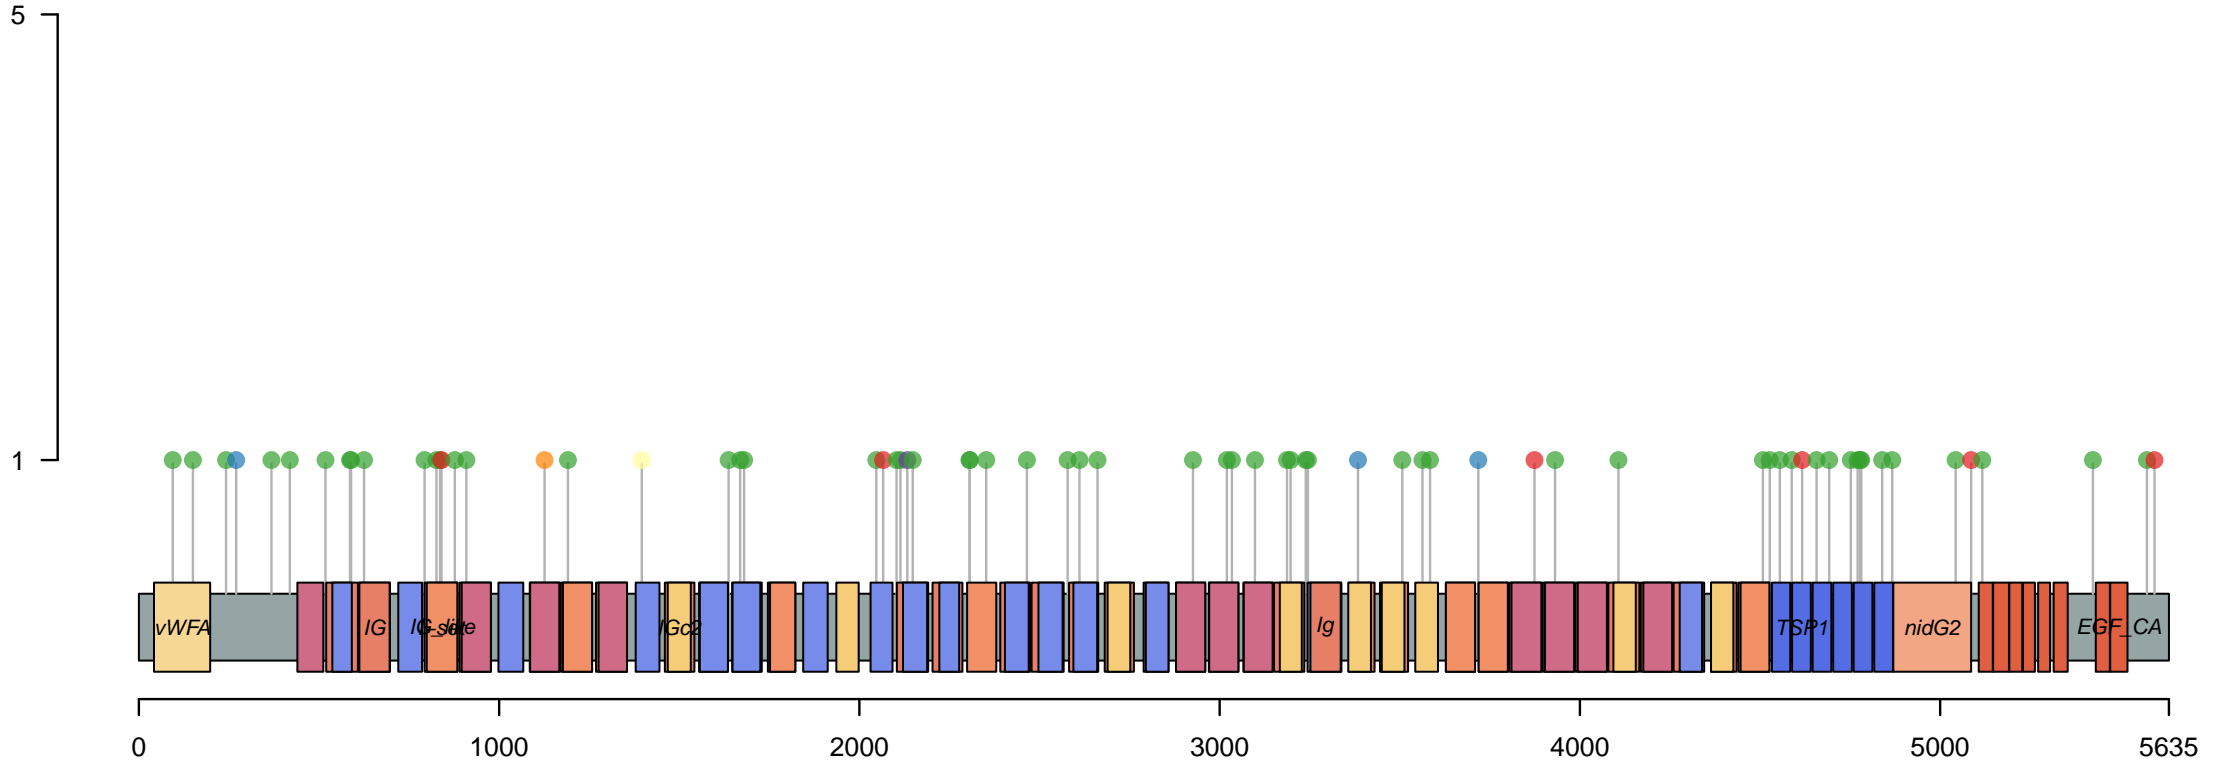

- Missense\_Mutation
- Splice\_Site
- Frame\_Shift\_Del
- In\_Frame\_Del
- Nonsense\_Mutation
- Frame\_Shift\_Ins
