# Supplementary material
Source: Research Square preprint supplement (doi:10.21203/rs.3.rs-9356453/v1)
Supplement: Supplementary file 35 [file cc02c50422dcca4209579f4b.pdf]

*DNAH10* : [Somatic Mutation Rate: 2.15%]

NM\_207437

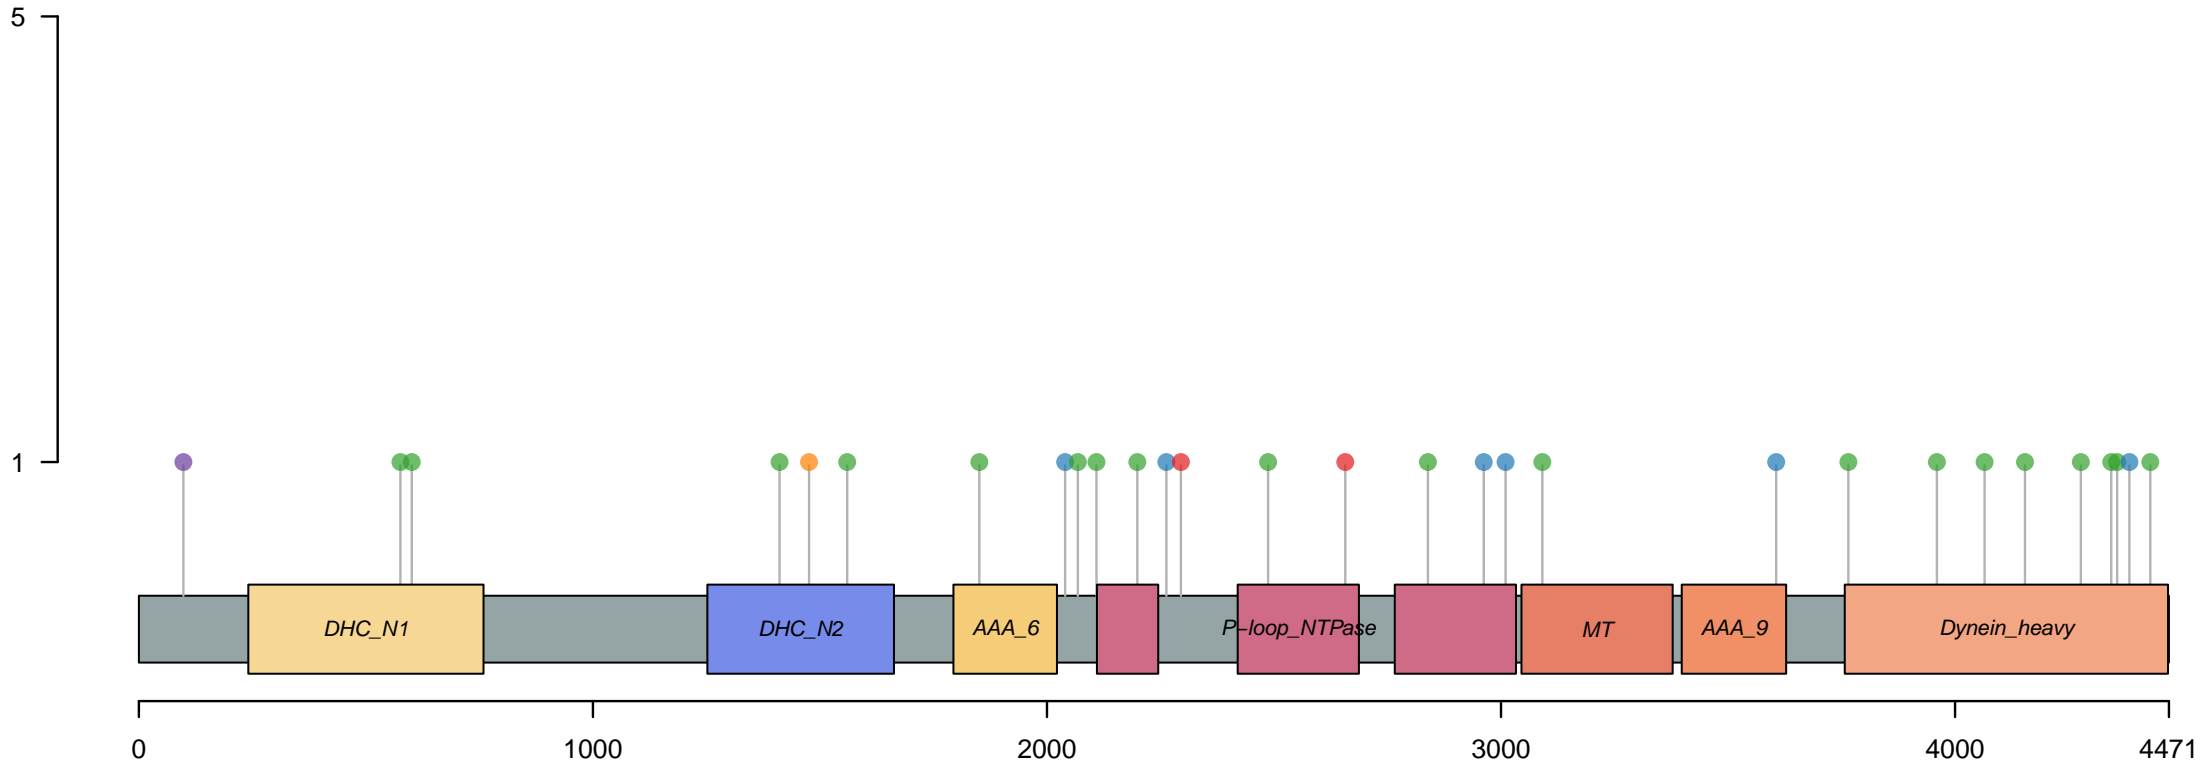

- Frame\_Shift\_Ins
- Frame\_Shift\_Del
- Missense\_Mutation
- Nonsense\_Mutation
- Splice\_Site
