# Supplementary material
Source: Research Square preprint supplement (doi:10.21203/rs.3.rs-9356453/v1)

ZCCHC6 : [Somatic Mutation Rate: 1.29%]

NM\_001185059

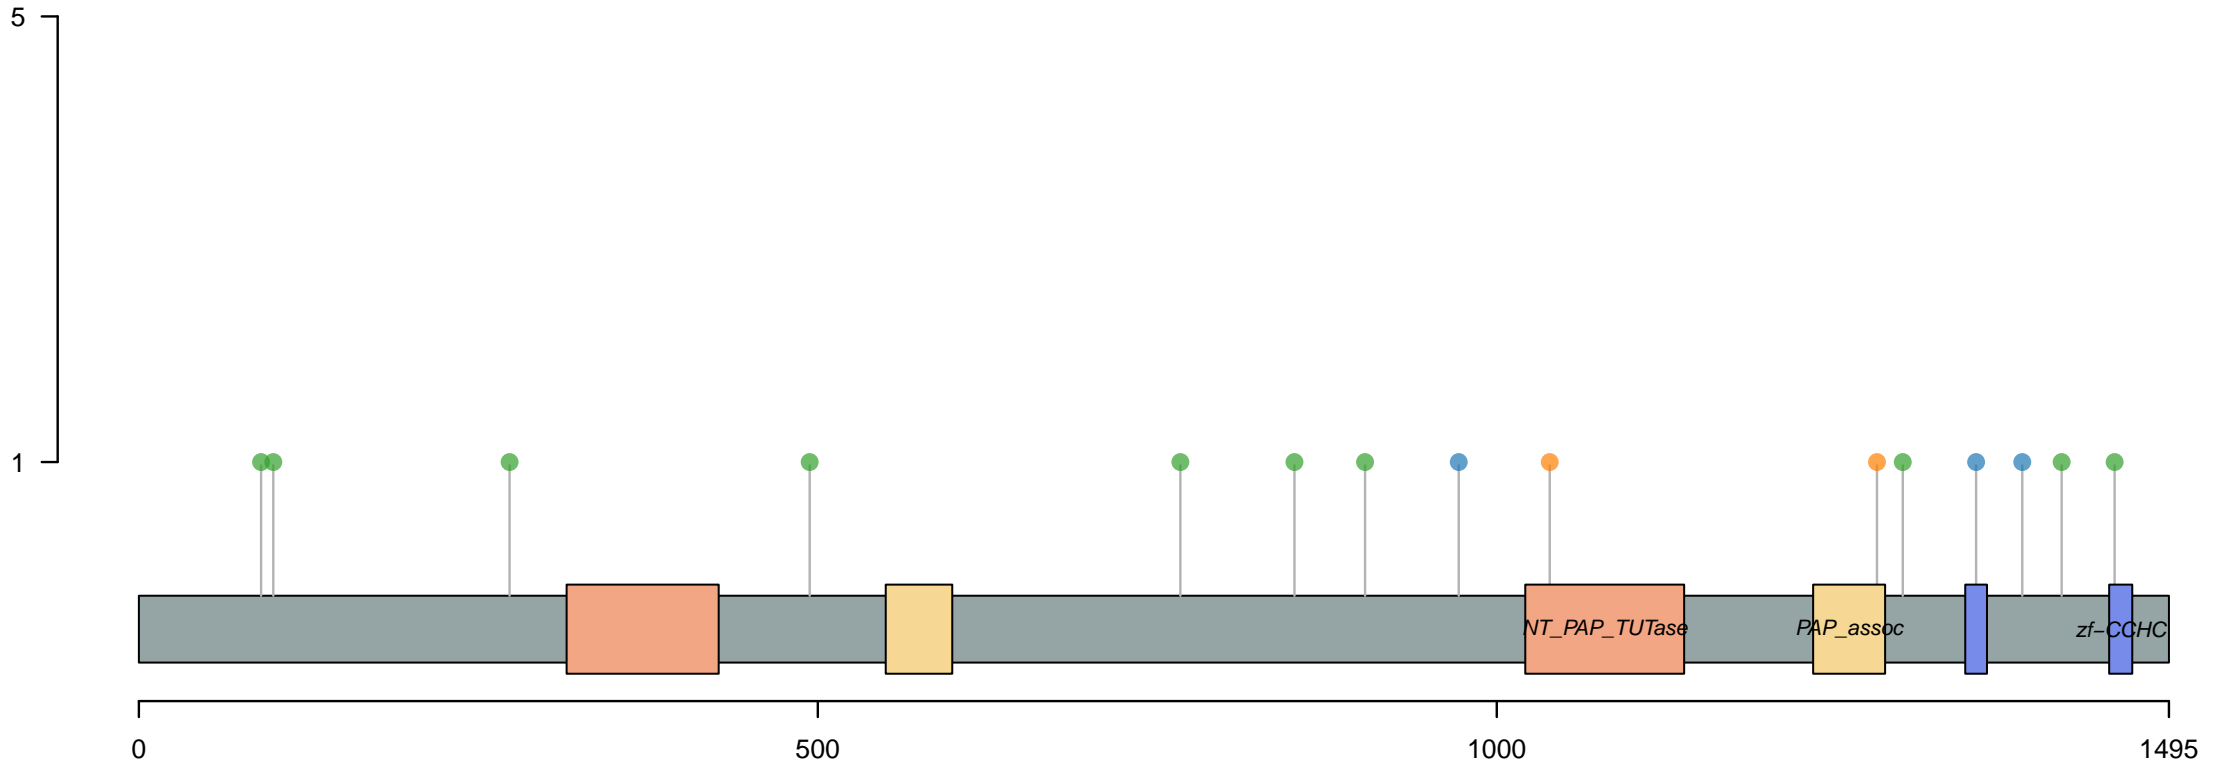

- Missense\_Mutation
- Frame\_Shift\_Del
- Splice\_Site

Supplement: Supplementary file 1 [file 02e6403e2191ceaacfd187e2.pdf]

NLGN4X : [Somatic Mutation Rate: 1.39%]

NM\_020742

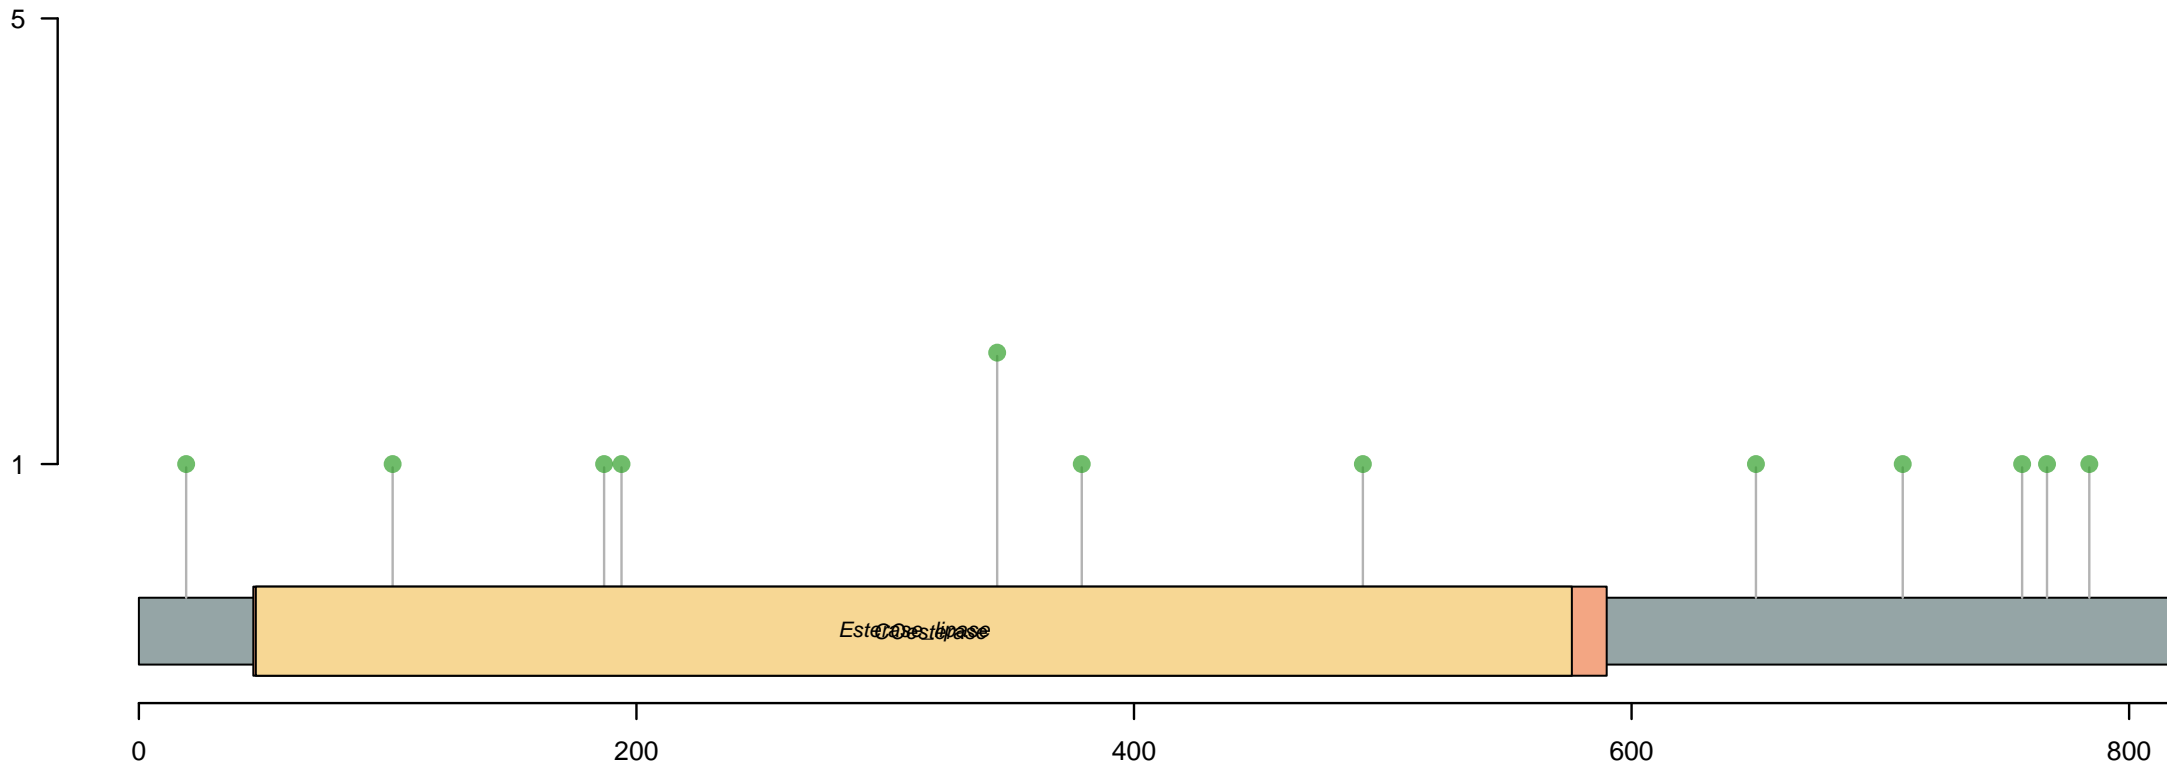

● Missense\_Mutation

Supplement: Supplementary file 2 [file 06dd29aed76403641384a7c3.pdf]

KCNH1 : [Somatic Mutation Rate: 1.07%]  
NM\_172362

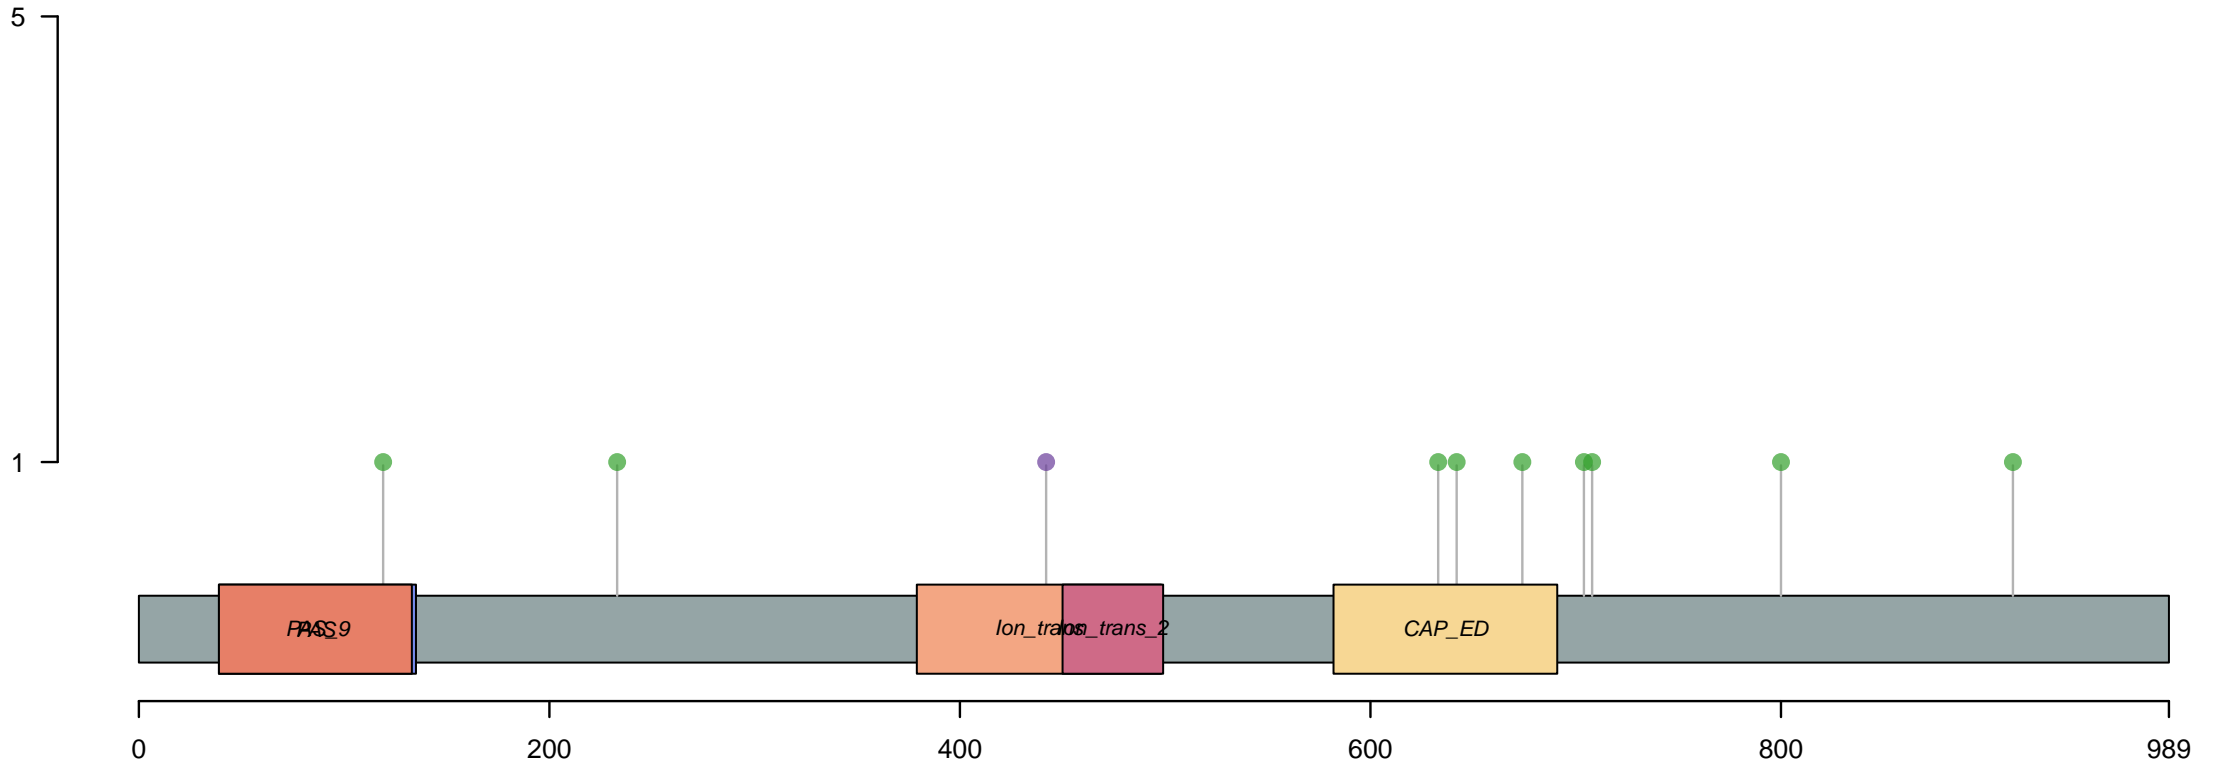

- Missense\_Mutation
- Frame\_Shift\_Ins

Supplement: Supplementary file 3 [file 09963a41d37b79ea7d210c38.pdf]

*PIK3CA* : [Somatic Mutation Rate: 33.8%]

NM\_006218

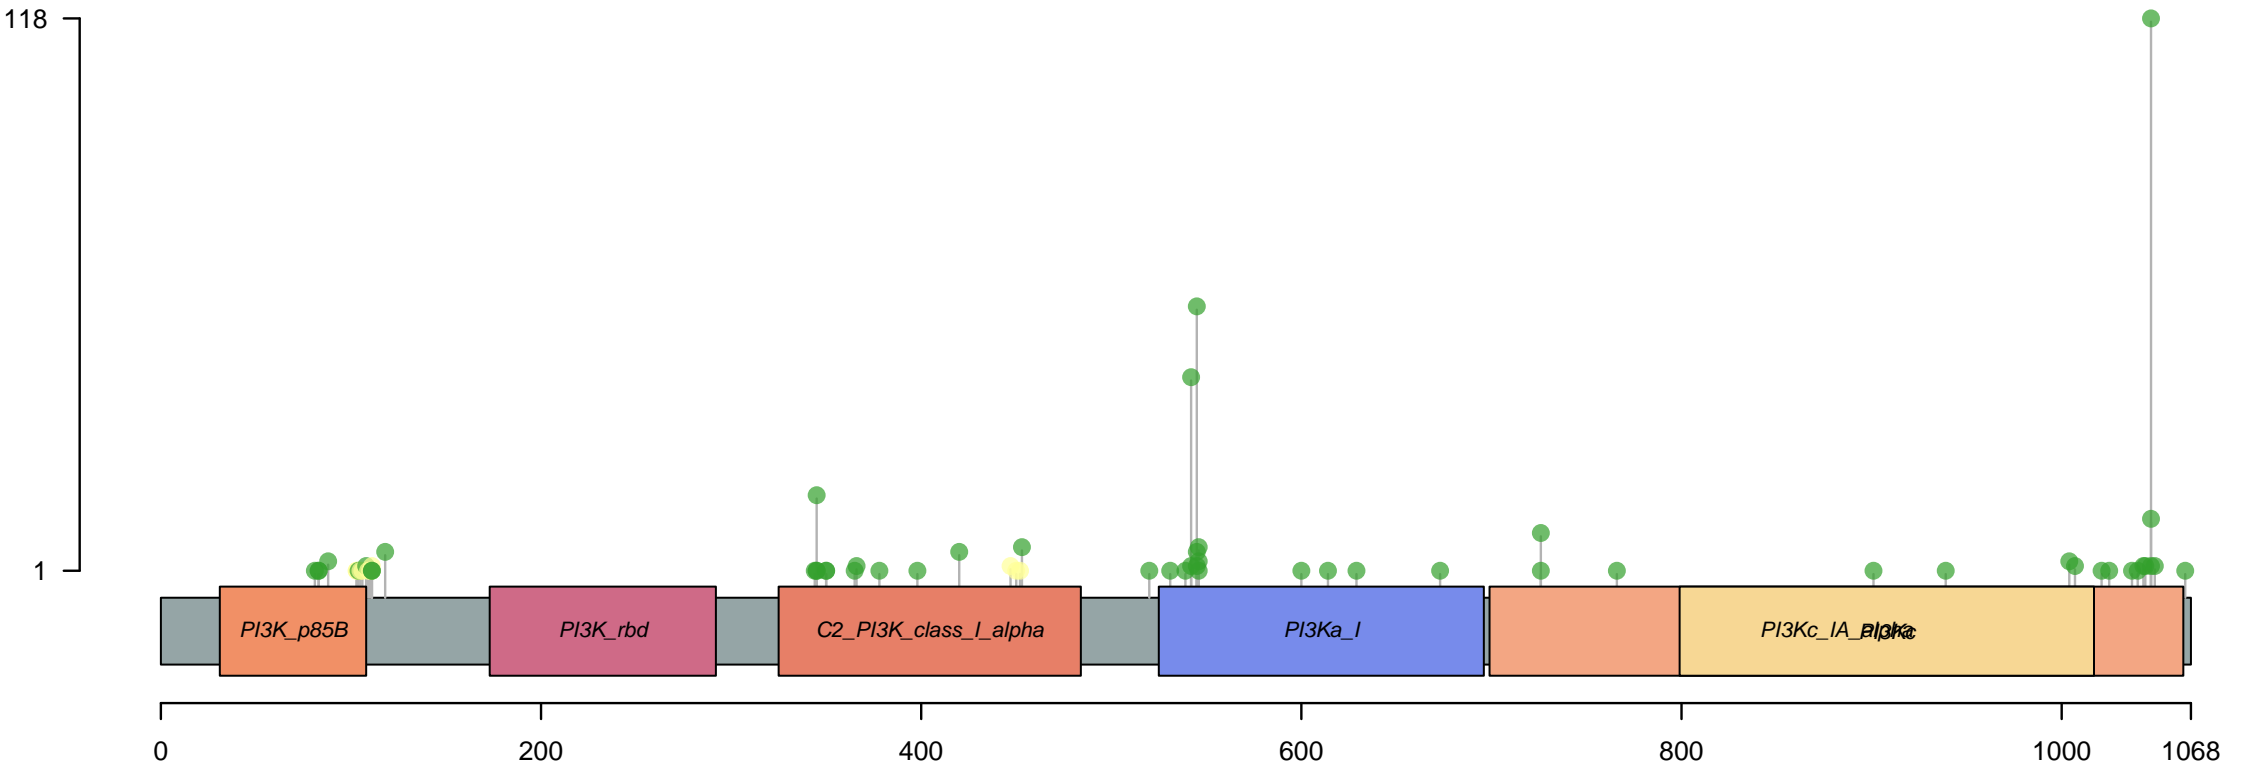

● Missense\_Mutation

● In\_Frame\_Del

Supplement: Supplementary file 4 [file 0a44e0b9b5da2d3898fee231.pdf]

CDH12 : [Somatic Mutation Rate: 1.29%]

NM\_004061

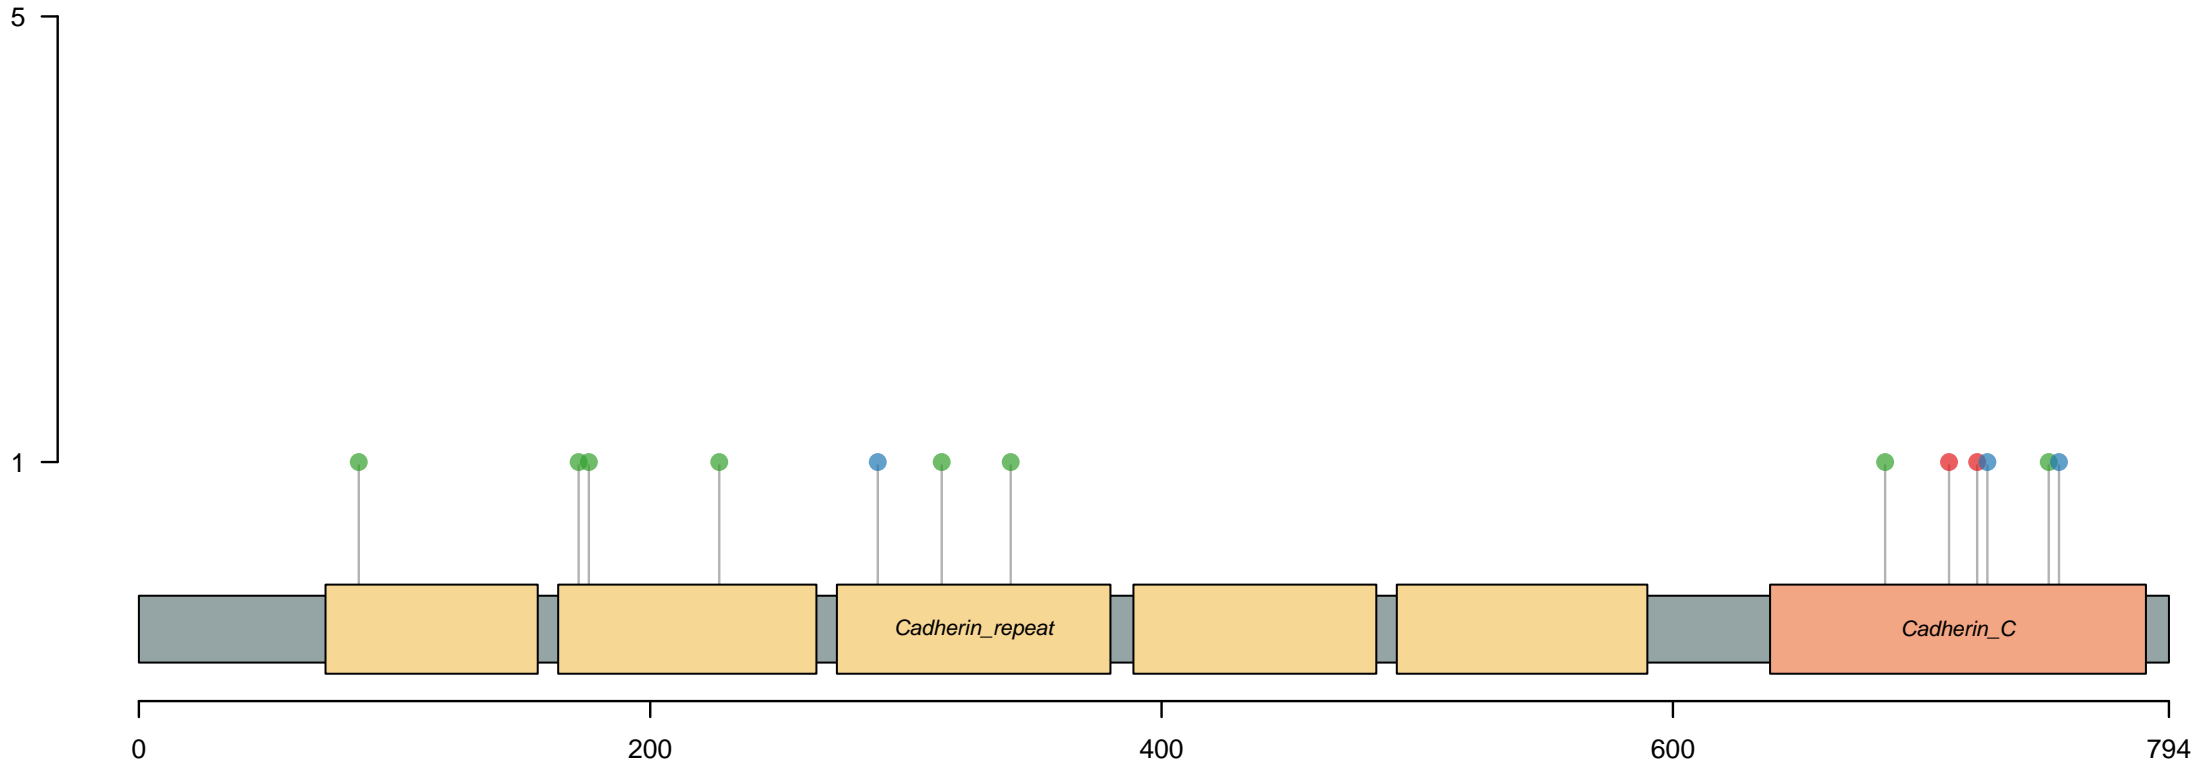

- Missense\_Mutation
- Frame\_Shift\_Del
- Nonsense\_Mutation

Supplement: Supplementary file 5 [file 10b04f76205e0e2574e66862.pdf]

FYCO1 : [Somatic Mutation Rate: 0.97%]

NM\_024513

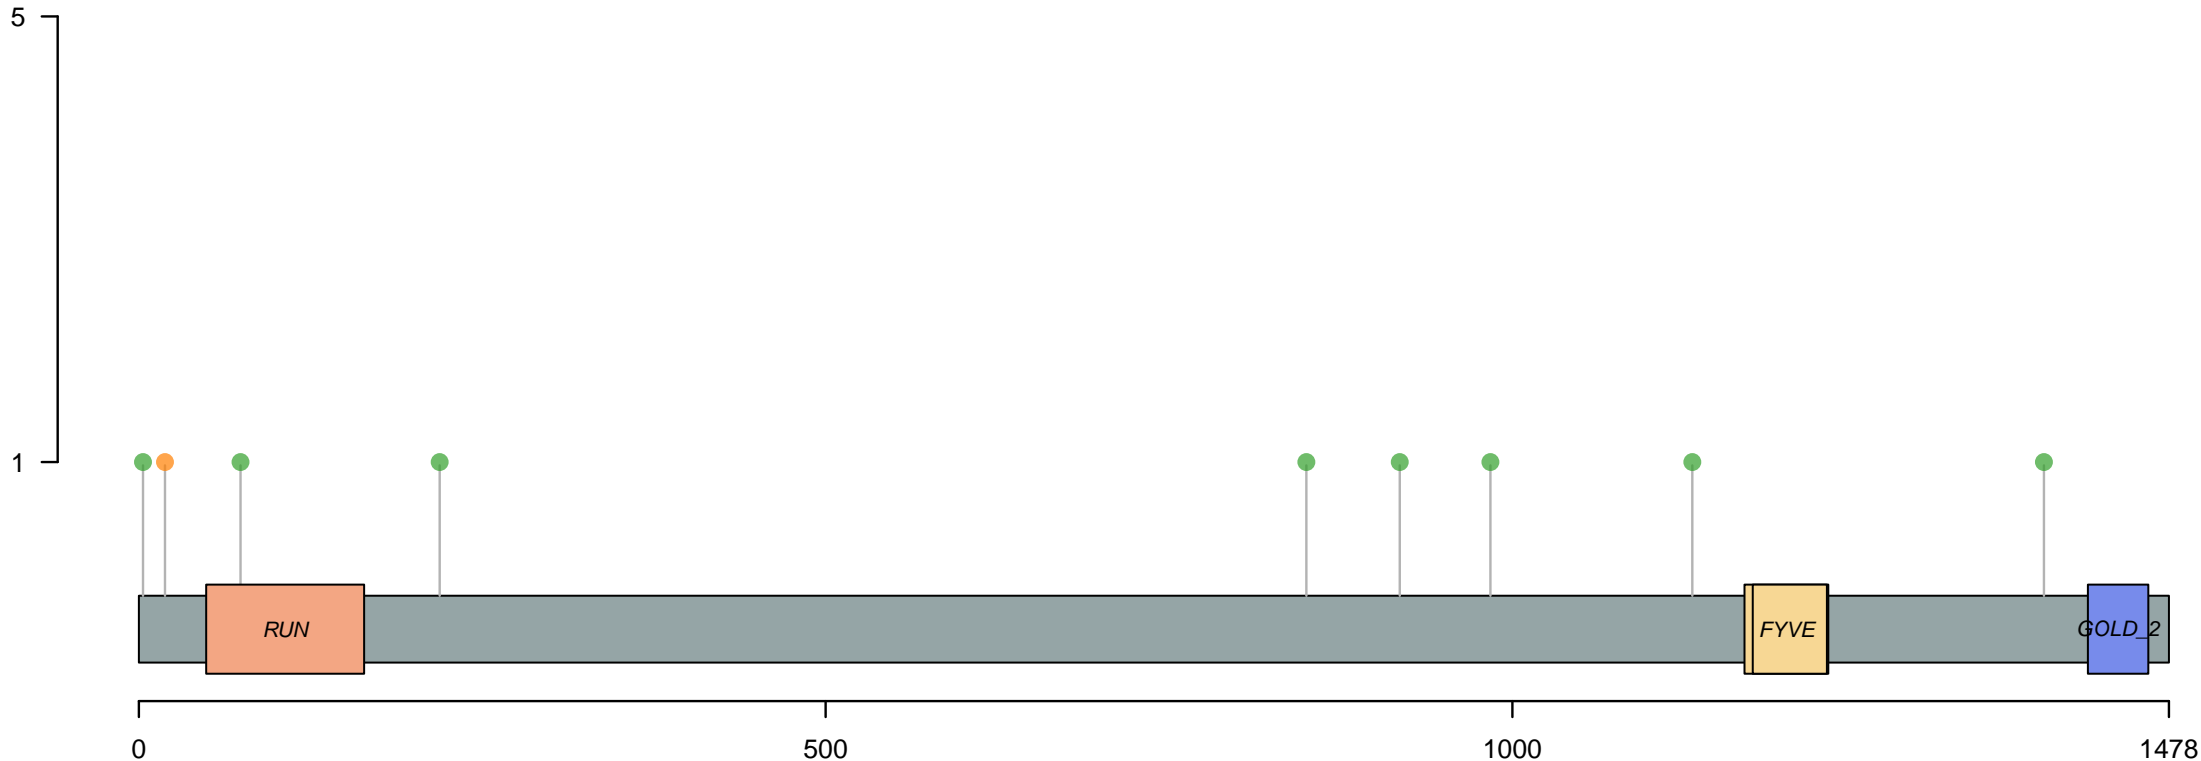

- Missense\_Mutation
- Splice\_Site

Supplement: Supplementary file 7 [file 15e8b9bdc77c4d9b6c56eedc.pdf]

MARK1 : [Somatic Mutation Rate: 1.29%]

NM\_018650

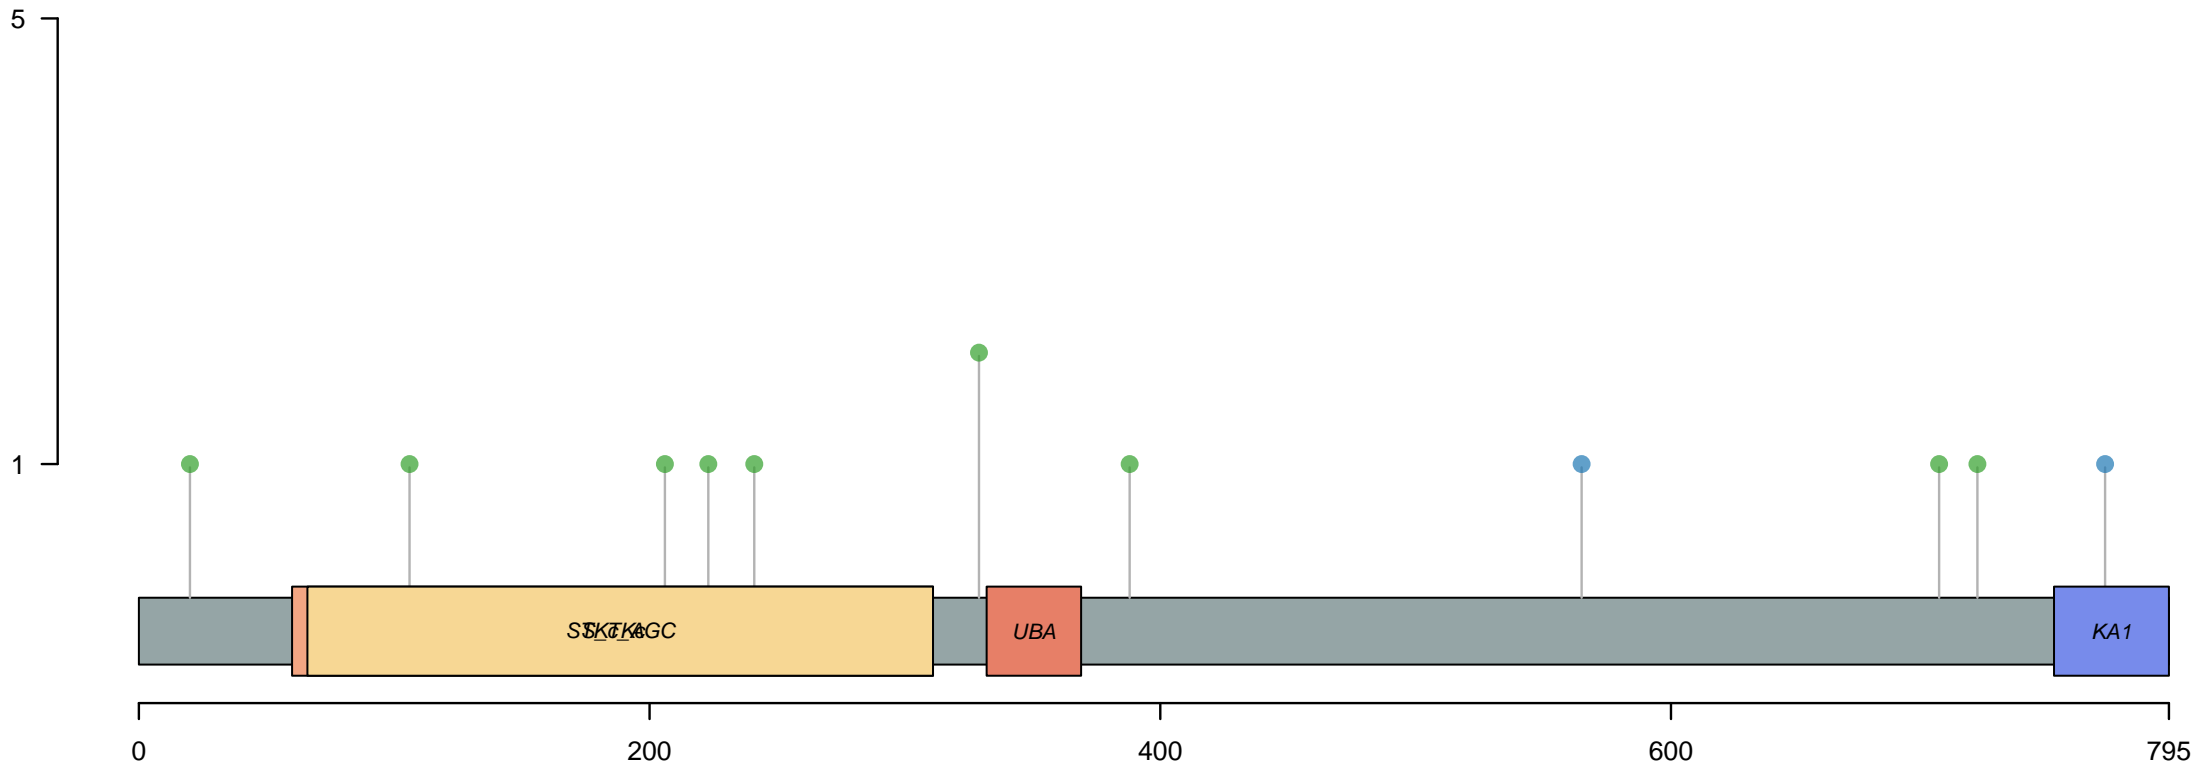

● Missense\_Mutation

● Frame\_Shift\_Del

Supplement: Supplementary file 8 [file 21f87b8a7961b6b6f04b62a3.pdf]

HDAC6 : [Somatic Mutation Rate: 1.29%]

NM\_006044

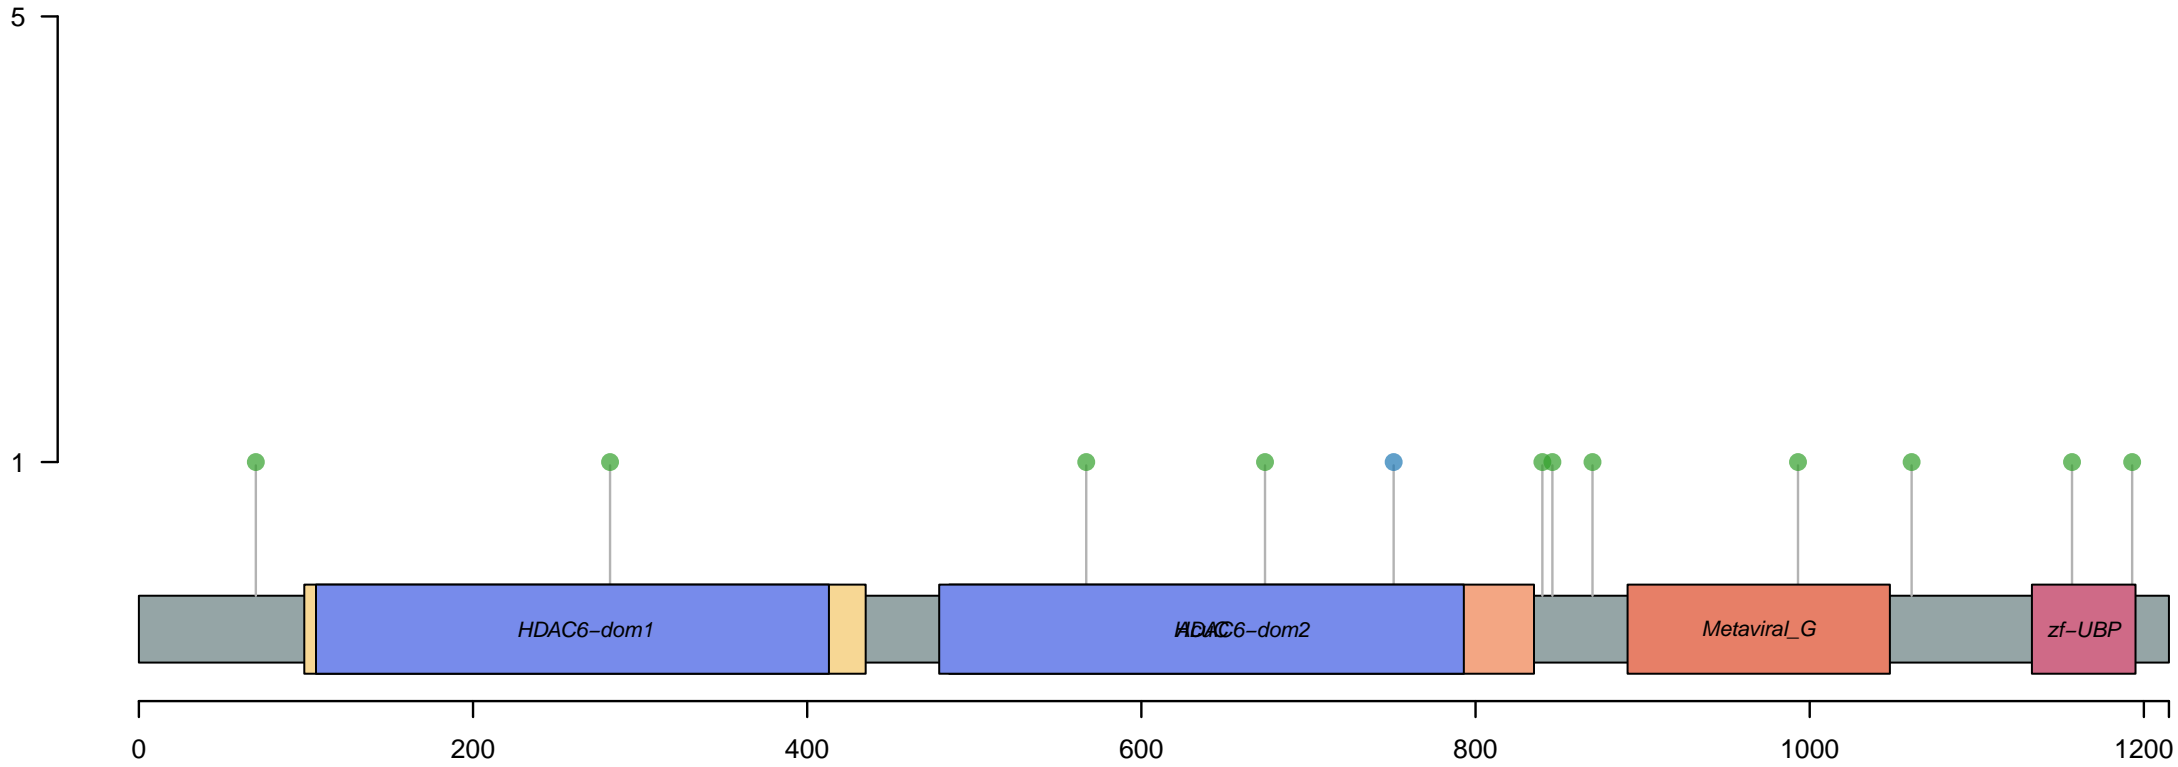

- Missense\_Mutation
- Frame\_Shift\_Del

Supplement: Supplementary file 12 [file 33f2a9569fae02357cdde42b.pdf]

KCNQ3 : [Somatic Mutation Rate: 0.97%]  
NM\_004519

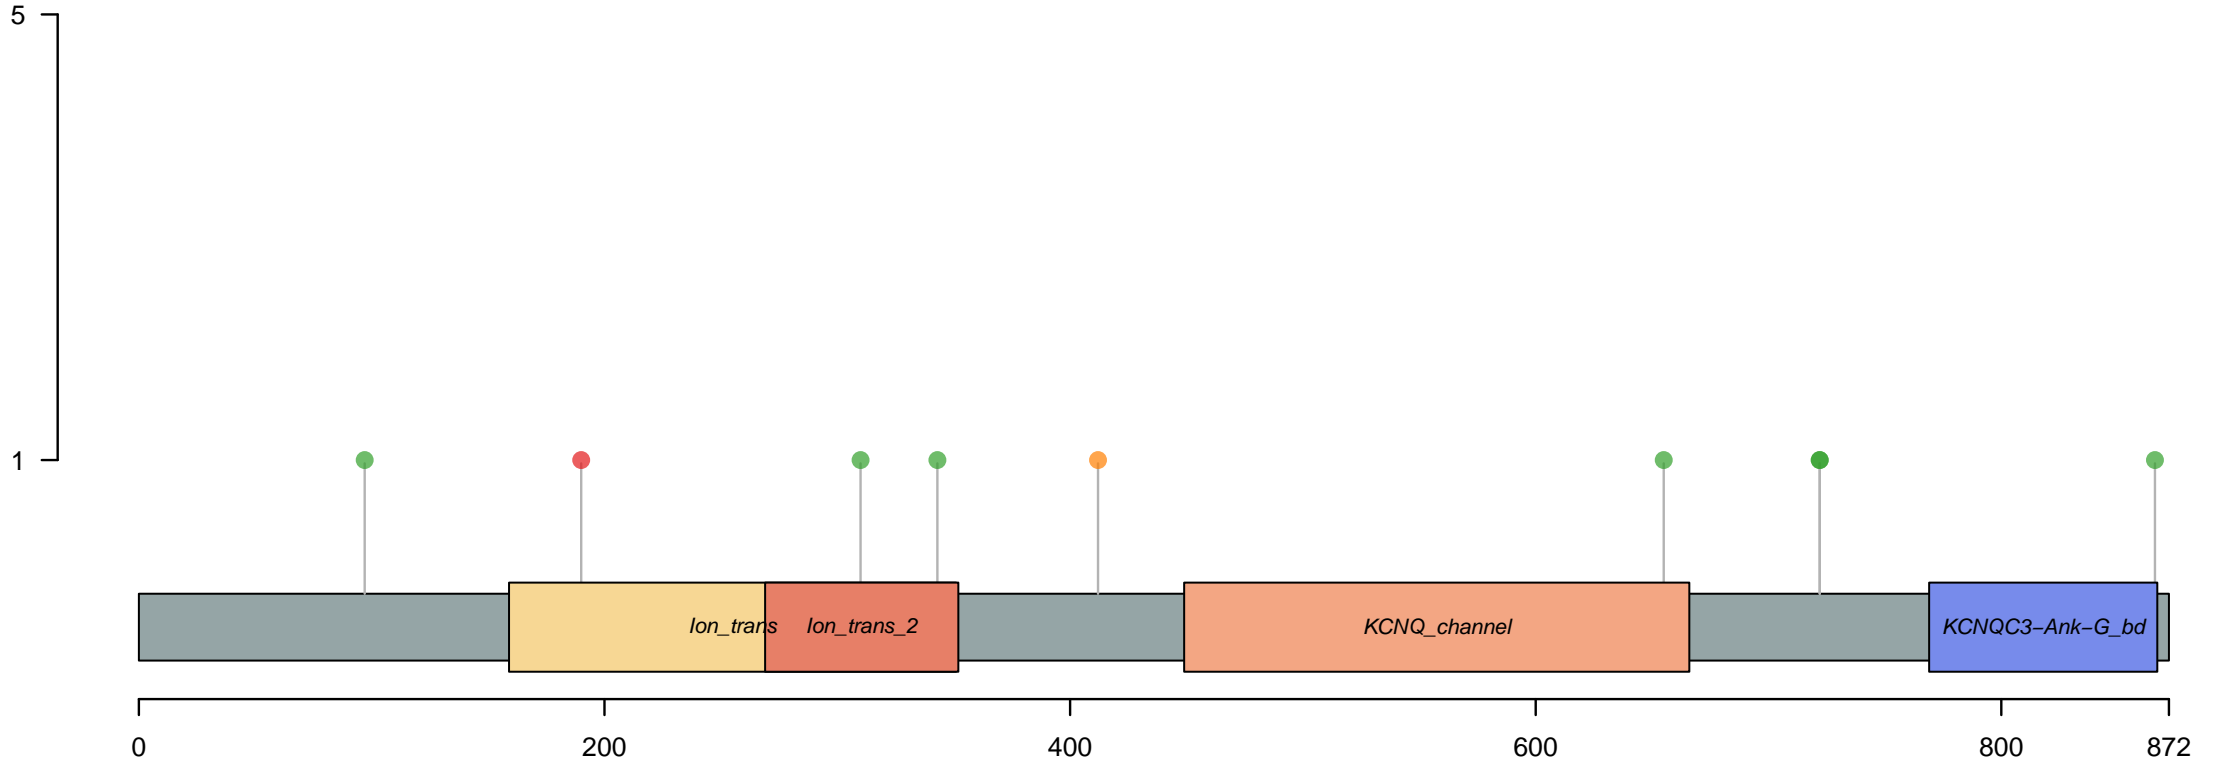

- Missense\_Mutation
- Nonsense\_Mutation
- Splice\_Site

Supplement: Supplementary file 13 [file 35406ed825923c588ec3da52.pdf]

*RNF43* : [Somatic Mutation Rate: 0.86%]

NM\_017763

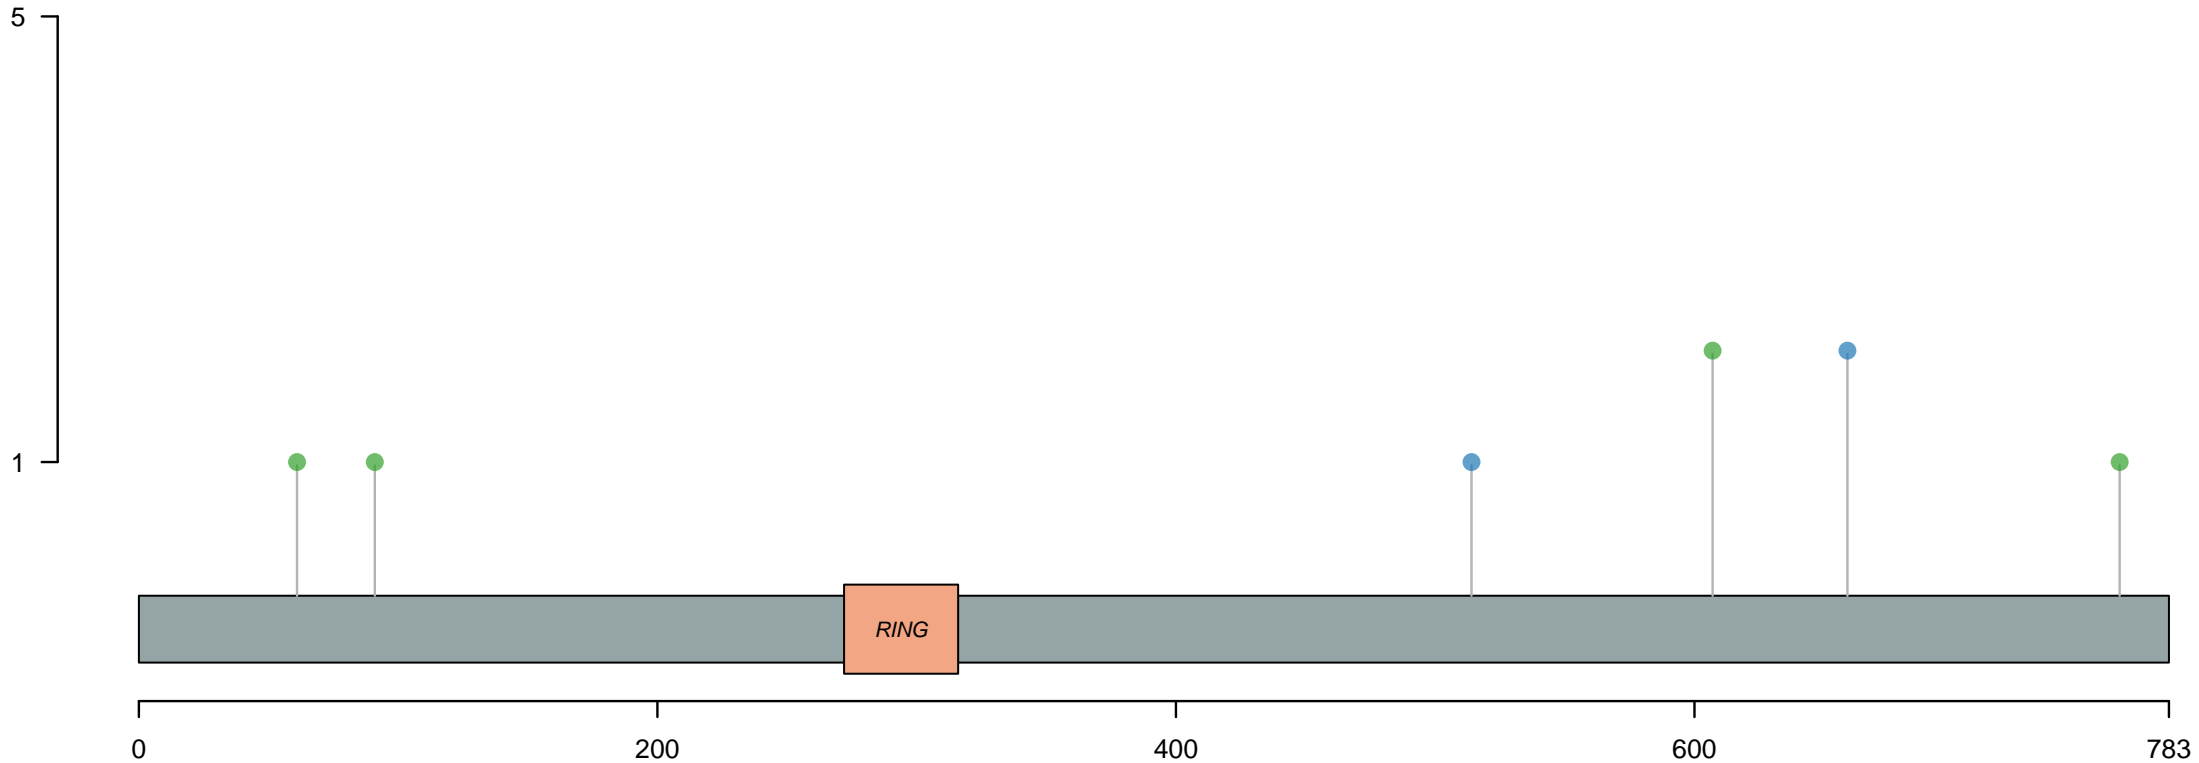

● Missense\_Mutation

● Frame\_Shift\_Del

Supplement: Supplementary file 16 [file 48e0ece8725c08193b05b4a1.pdf]

*ERBB3* : [Somatic Mutation Rate: 1.72%]

NM\_001982

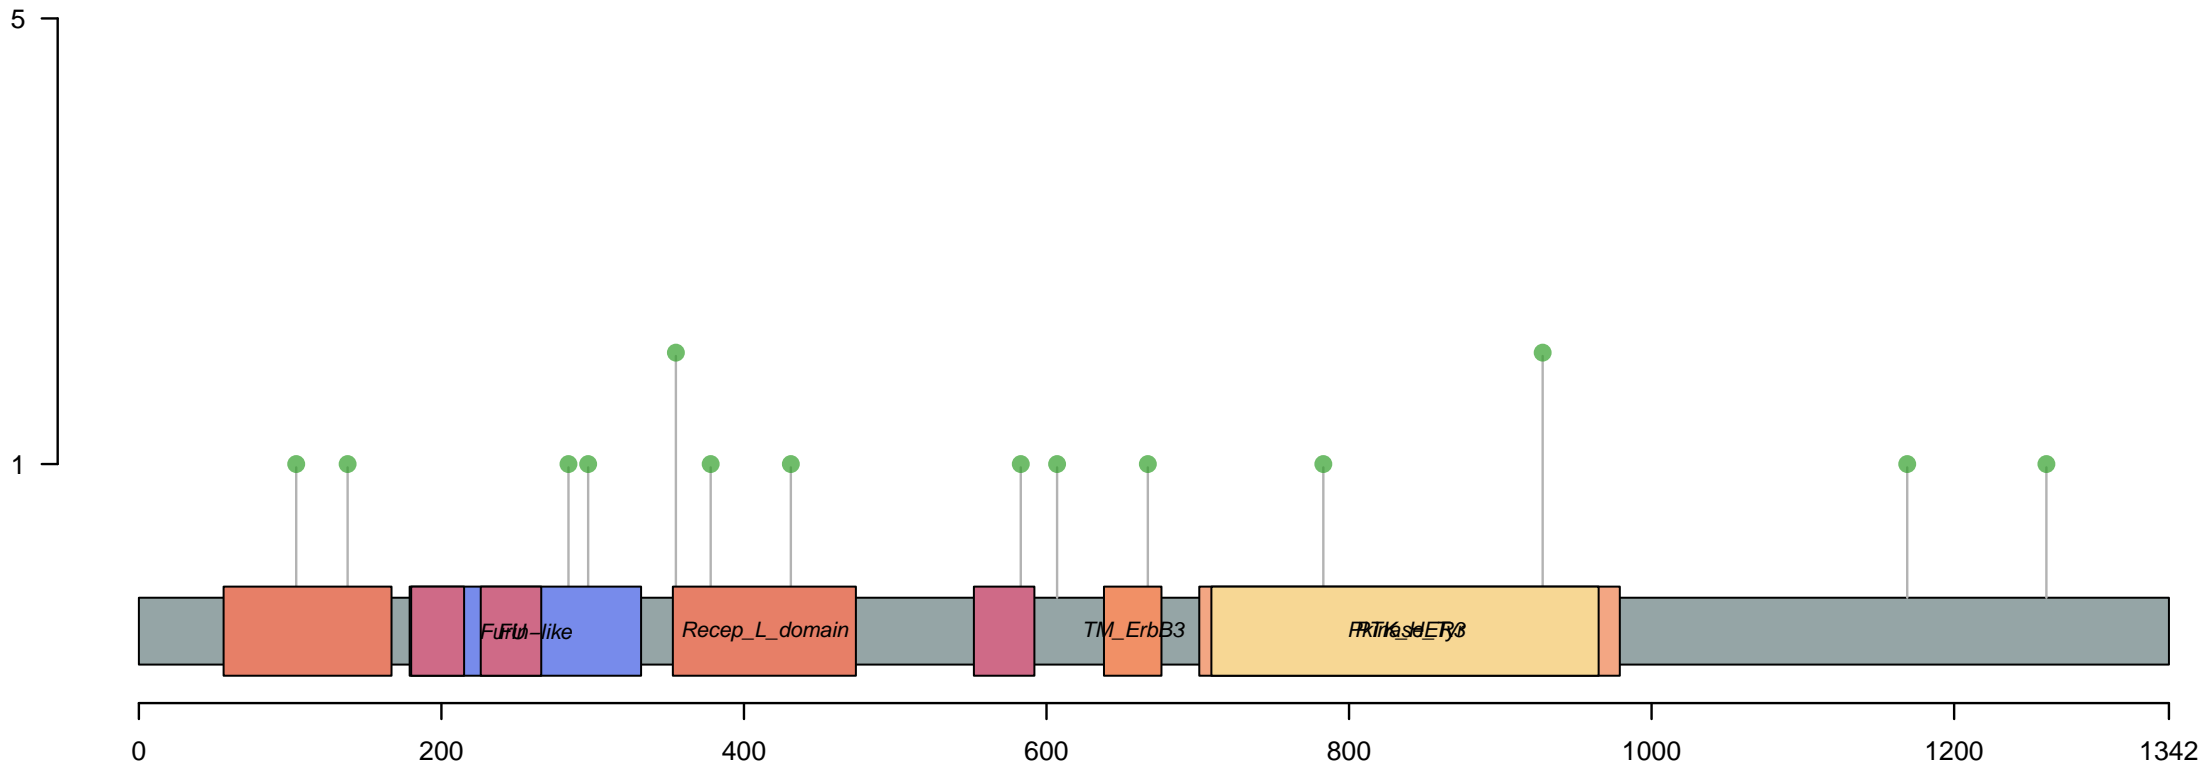

● Missense\_Mutation

Supplement: Supplementary file 19 [file 5242e012e01056541d2ae3a3.pdf]

FBXO33 : [Somatic Mutation Rate: 0.64%]

NM\_203301

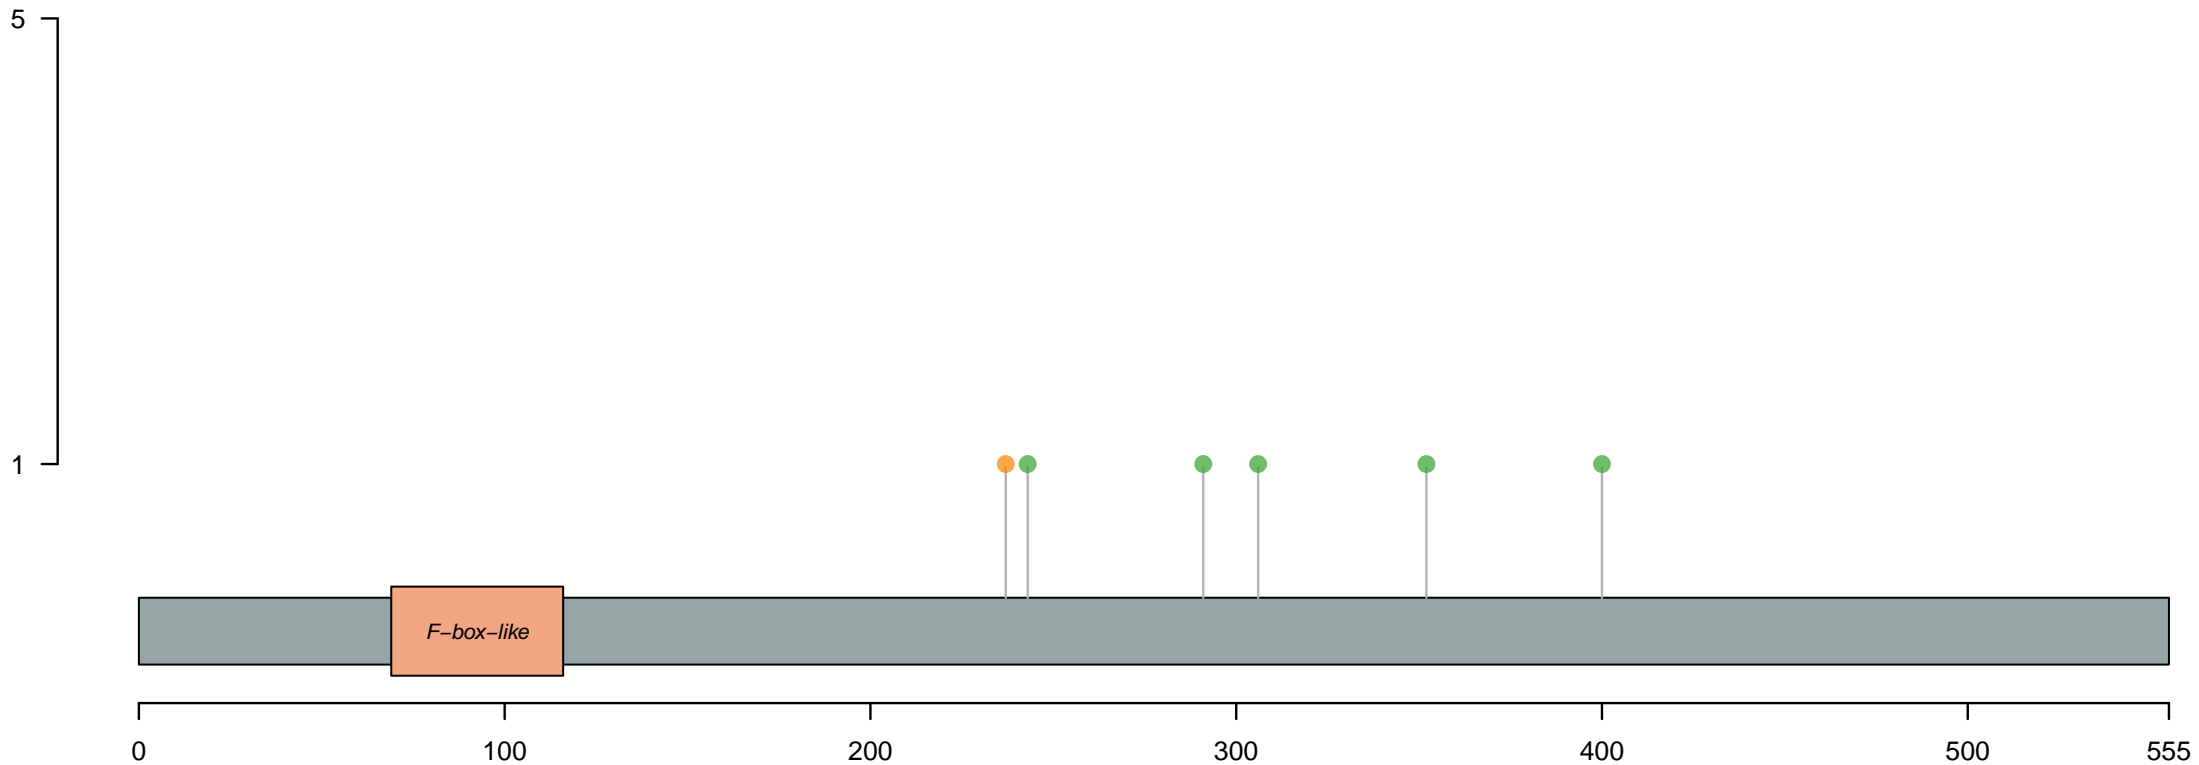

● Splice\_Site

● Missense\_Mutation

Supplement: Supplementary file 20 [file 5294681921e4dae9afa79ef0.pdf]

KIAA1549 : [Somatic Mutation Rate: 0.75%]

NM\_001164665

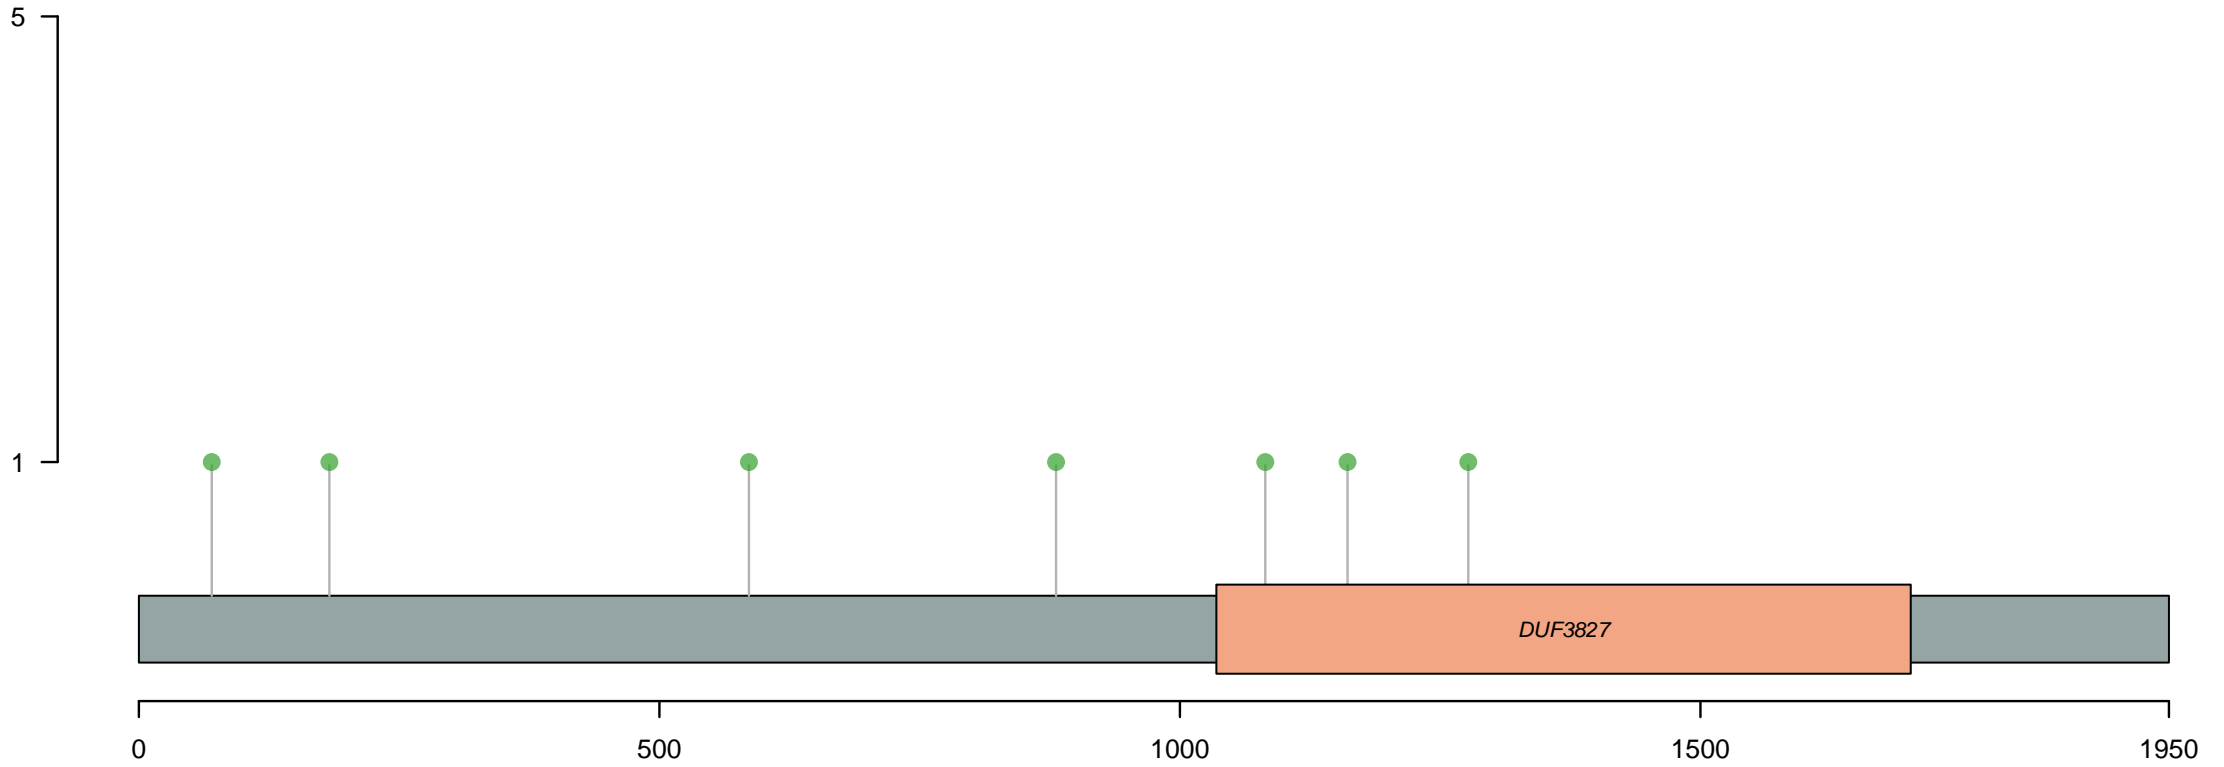

● Missense\_Mutation

Supplement: Supplementary file 21 [file 53d28fb0896d86d49ac133eb.pdf]

ABCC12 : [Somatic Mutation Rate: 1.07%]

NM\_033226

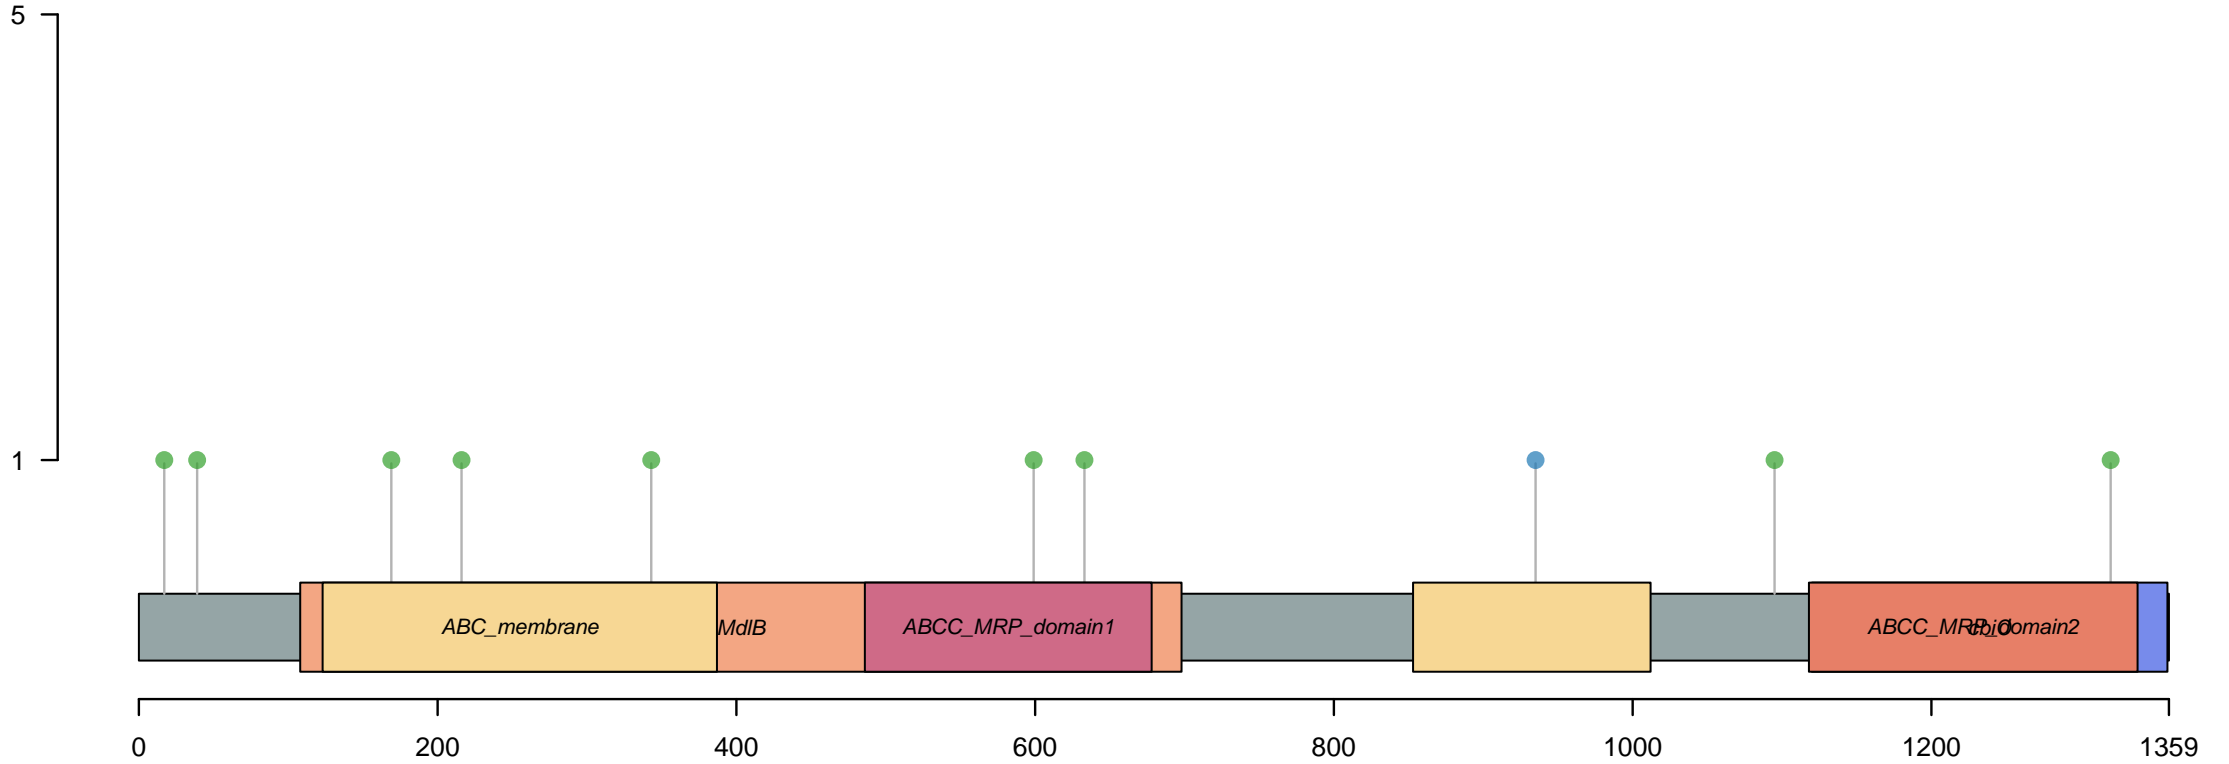

● Missense\_Mutation

● Frame\_Shift\_Del

Supplement: Supplementary file 22 [file 5c29d06093605829e04b66ea.pdf]

EEF2 : [Somatic Mutation Rate: 0.75%]

NM\_001961

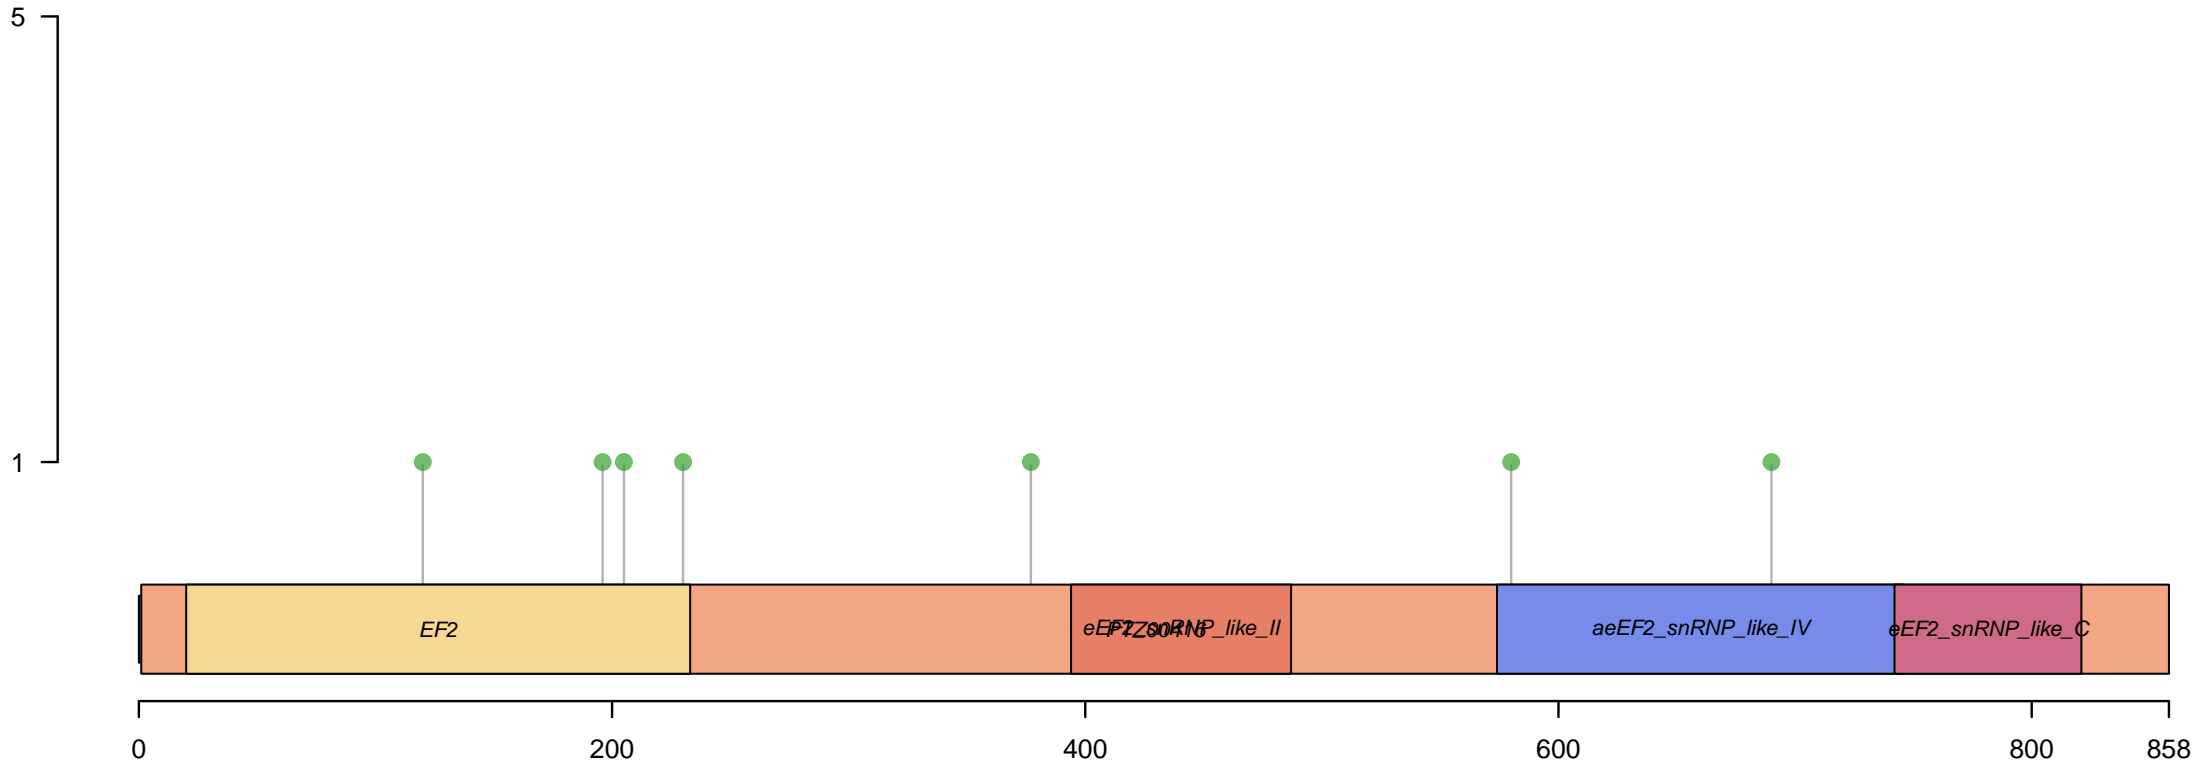

● Missense\_Mutation

Supplement: Supplementary file 23 [file 61c6560d92a6a6ad32497185.pdf]

AXL : [Somatic Mutation Rate: 0.86%]

NM\_021913

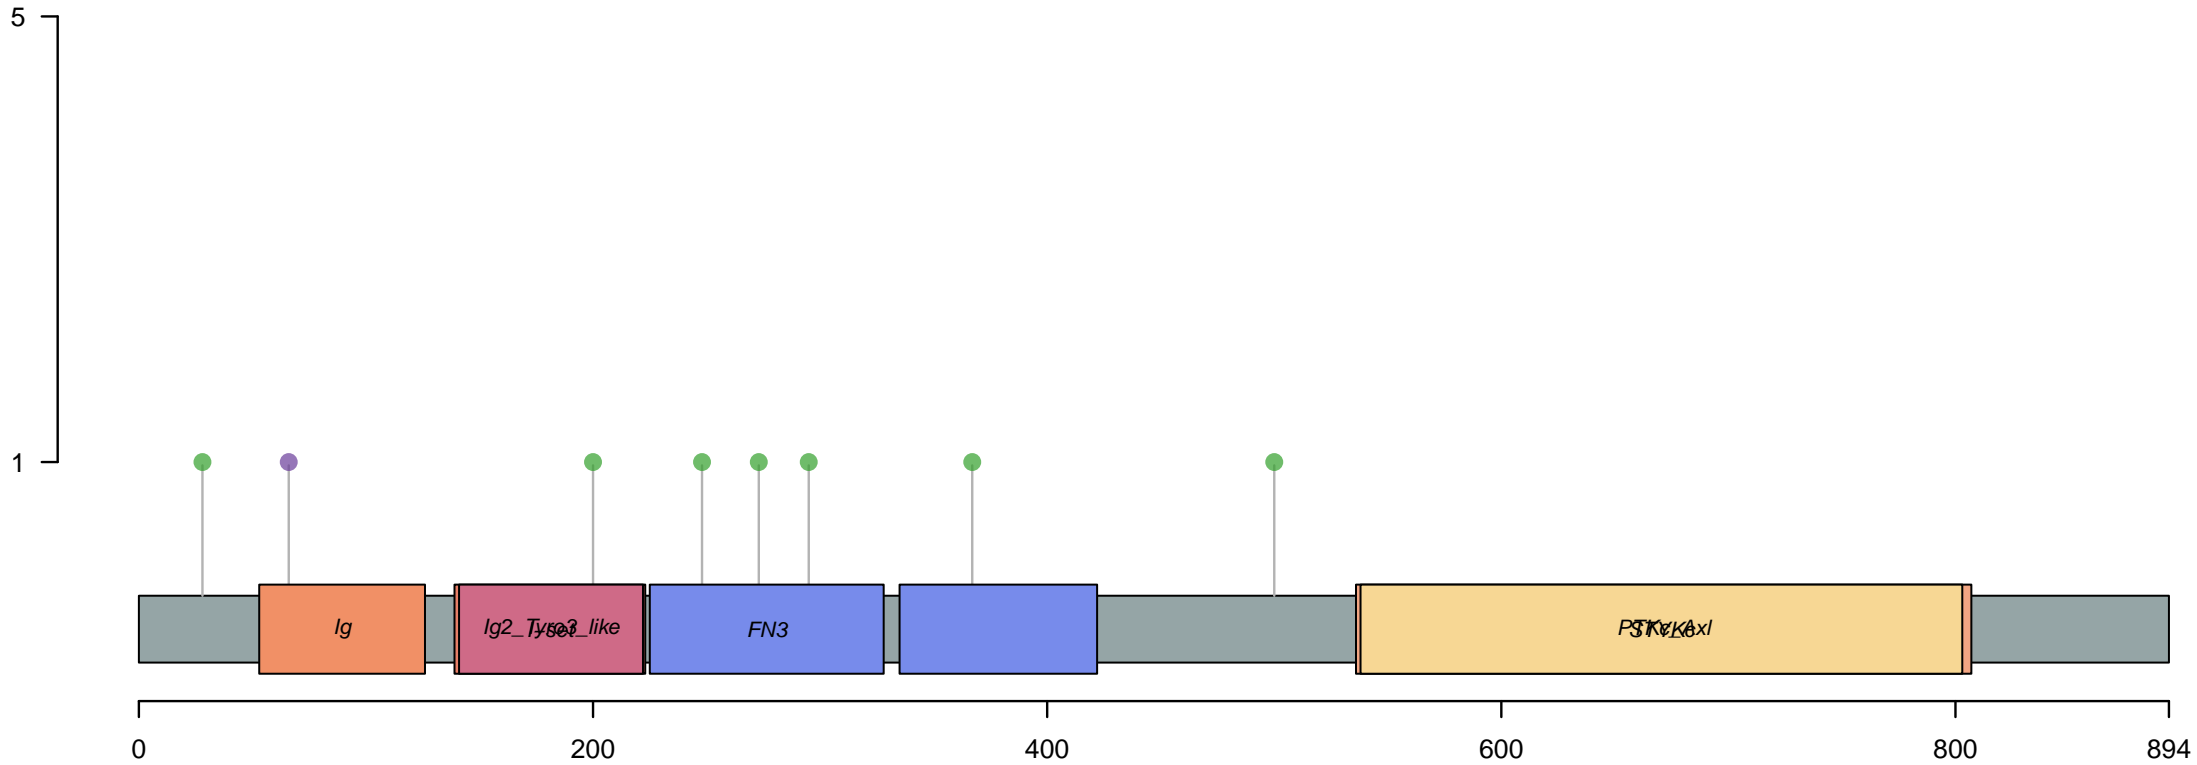

● Missense\_Mutation

● Frame\_Shift\_Ins

Supplement: Supplementary file 24 [file 7c6afc95da22d85cdde2e195.pdf]

OAS2 : [Somatic Mutation Rate: 1.07%]  
NM\_016817

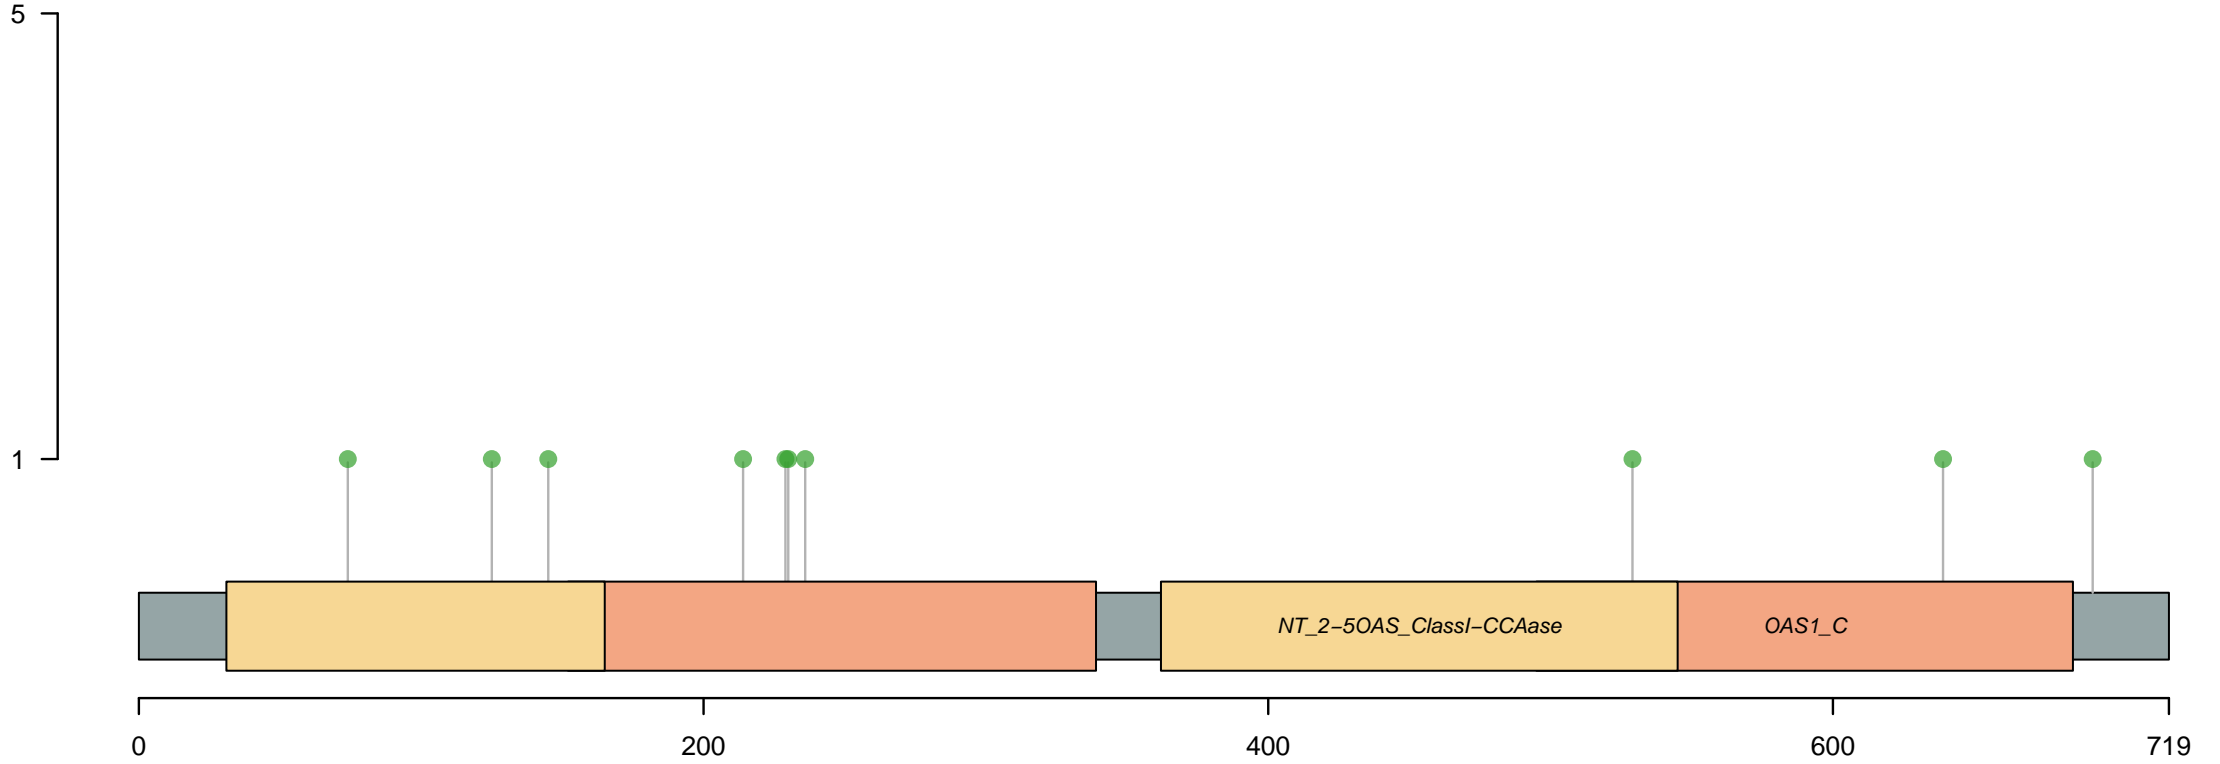

● Missense\_Mutation

Supplement: Supplementary file 25 [file 86429b727eb78d2fdb9d63d7.pdf]

PCDHA11 : [Somatic Mutation Rate: 1.07%]  
NM\_018902

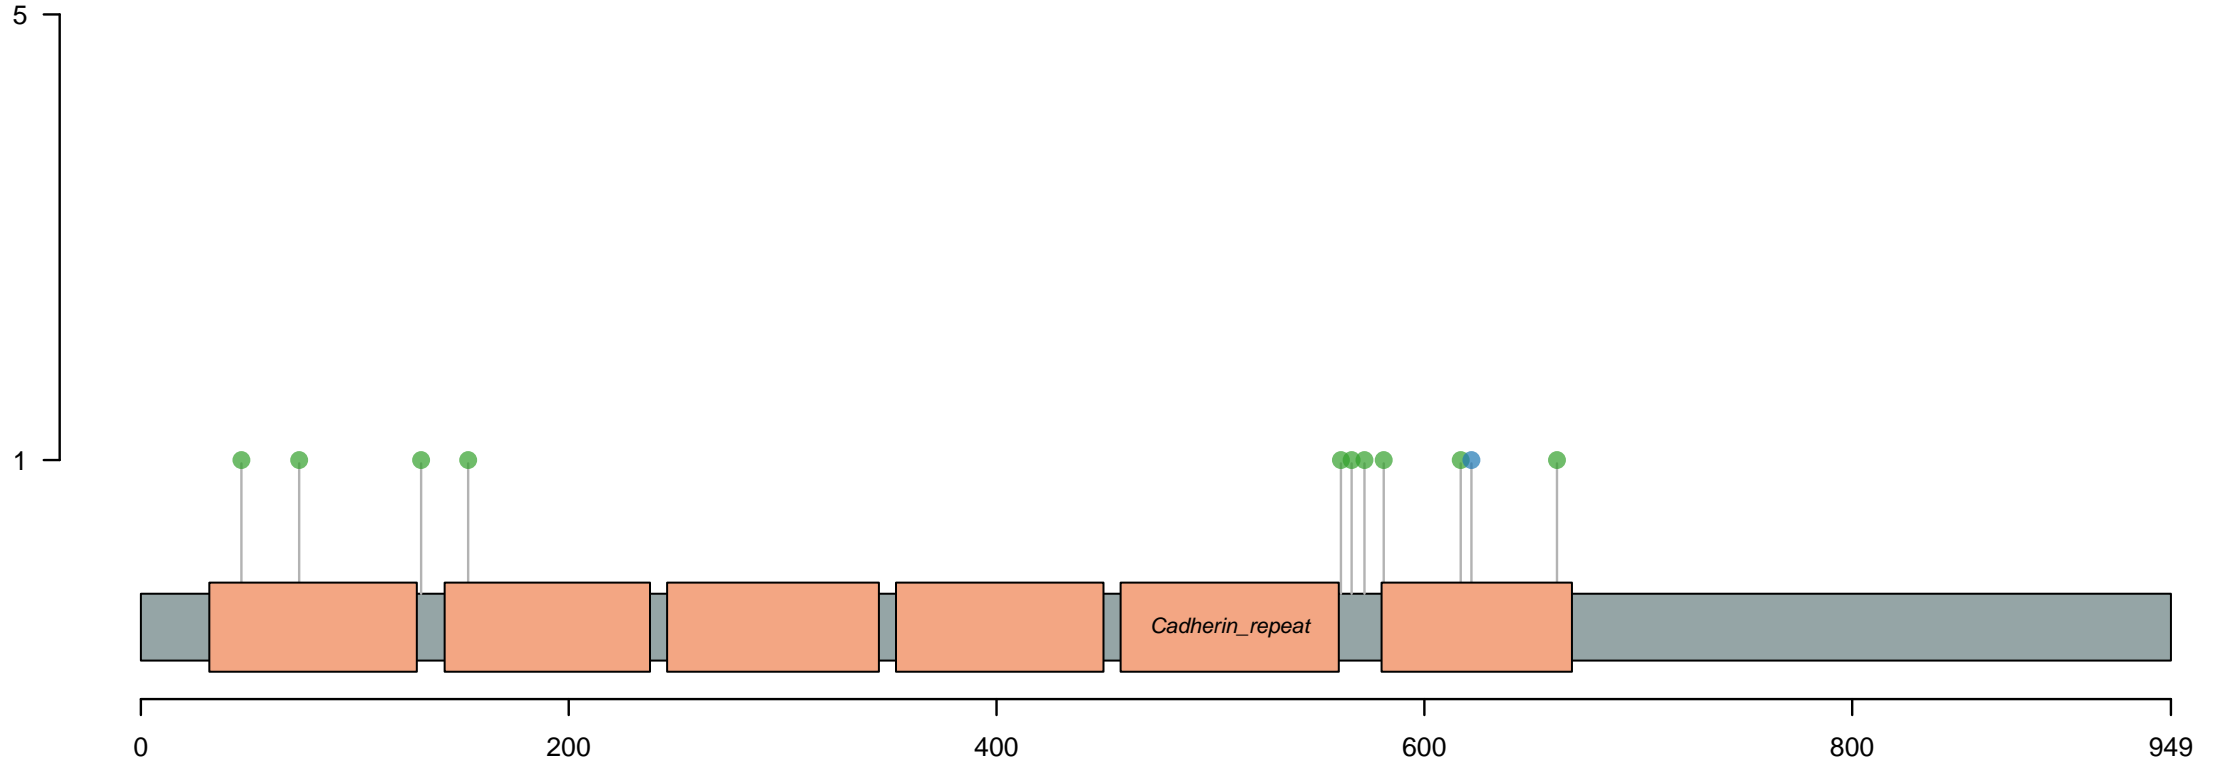

- Missense\_Mutation
- Frame\_Shift\_Del

Supplement: Supplementary file 26 [file 8ea07003aad61ce720342dce.pdf]

CNKSR2 : [Somatic Mutation Rate: 0.97%]

NM\_014927

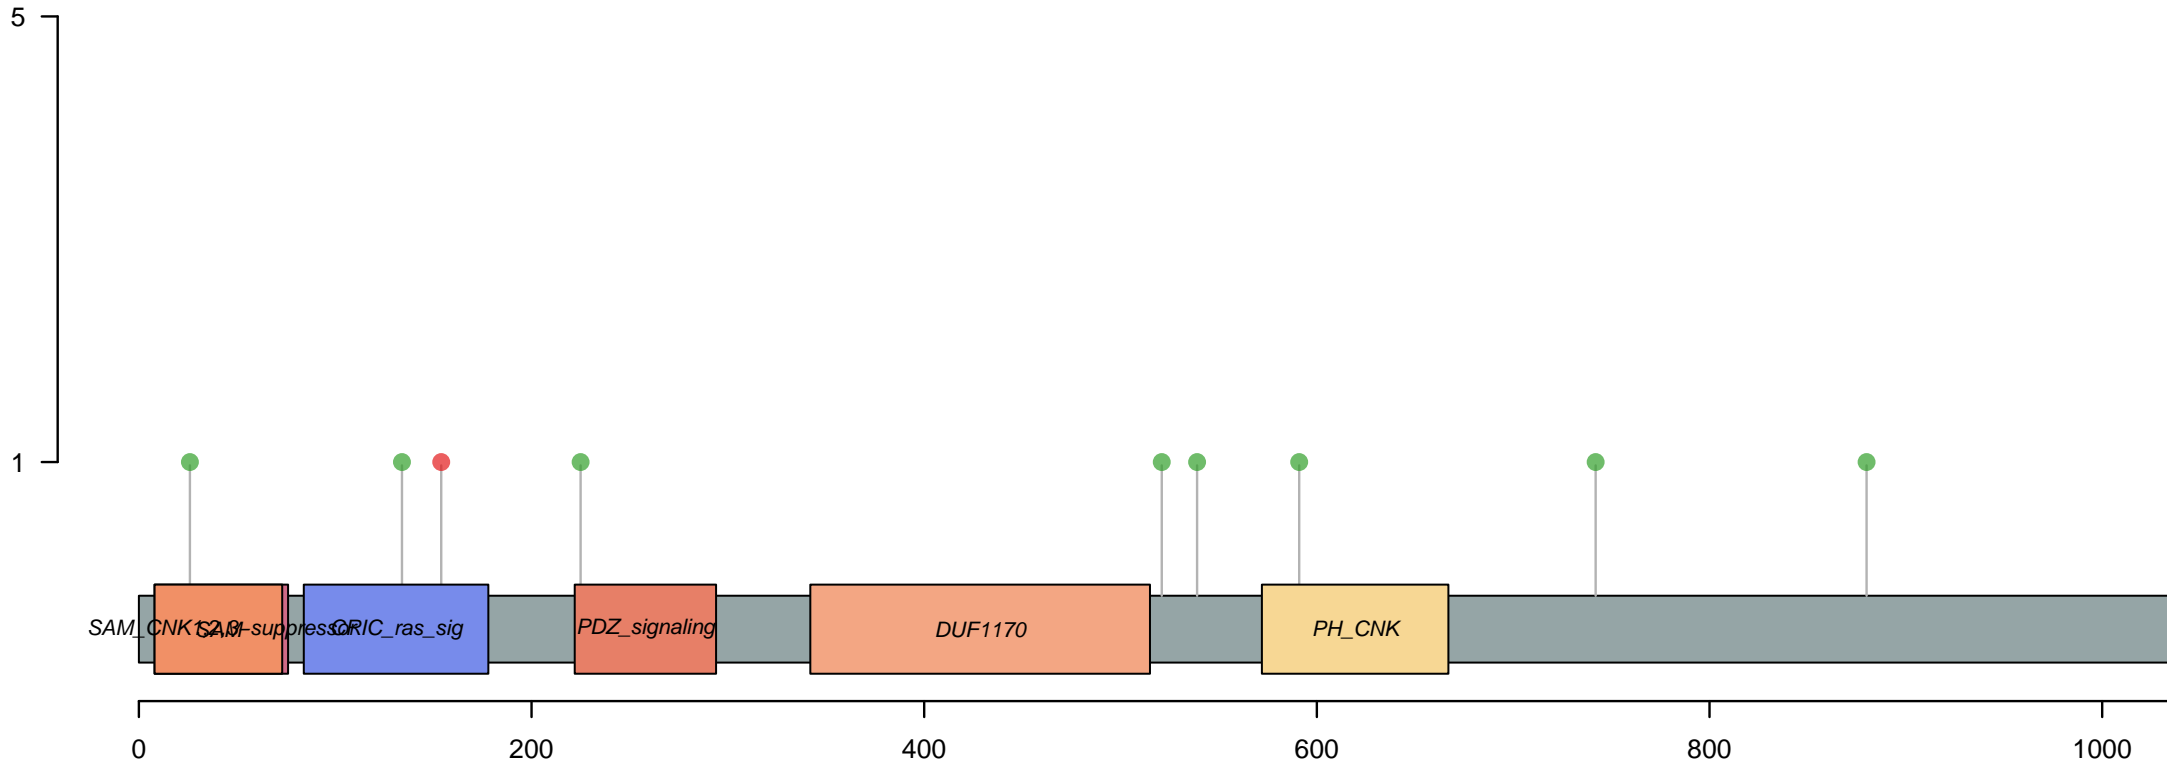

- Missense\_Mutation
- Nonsense\_Mutation

Supplement: Supplementary file 27 [file 8ee326ecfa490ec0fb7b7a15.pdf]

TYRP1 : [Somatic Mutation Rate: 0.97%]

NM\_000550

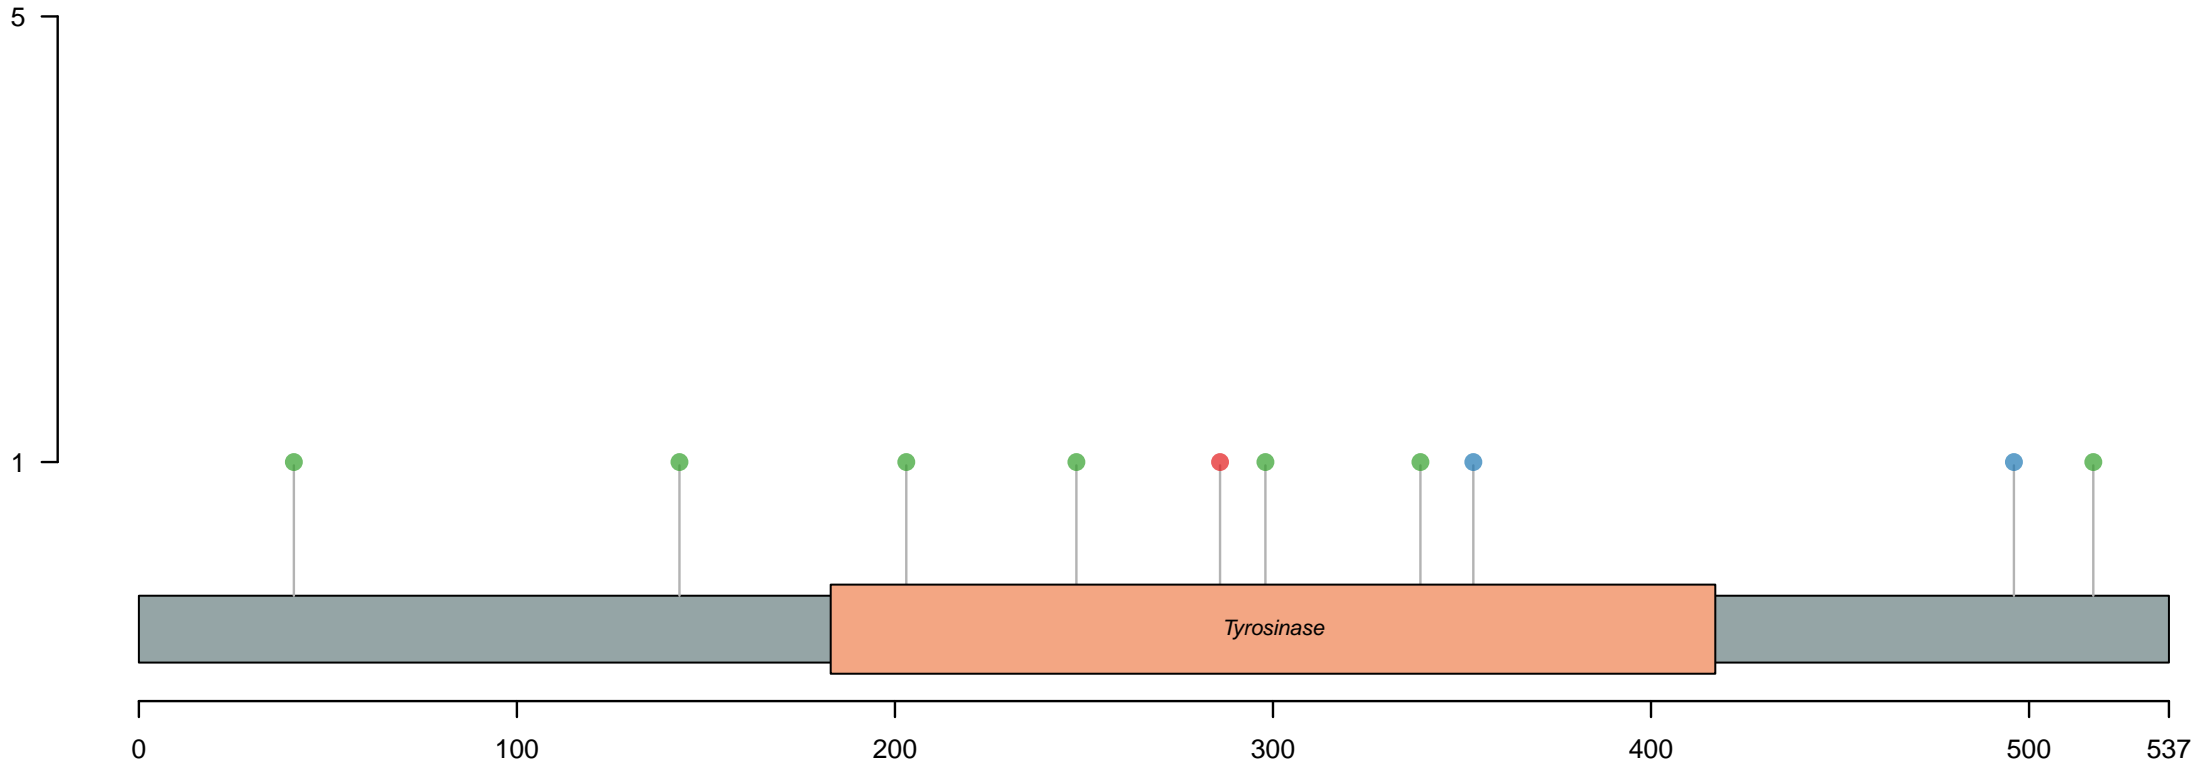

- Missense\_Mutation
- Nonsense\_Mutation
- Frame\_Shift\_Del

Supplement: Supplementary file 28 [file 9762abf7ad7f3ba028945e8f.pdf]

VCAM1 : [Somatic Mutation Rate: 0.97%]  
NM\_001078

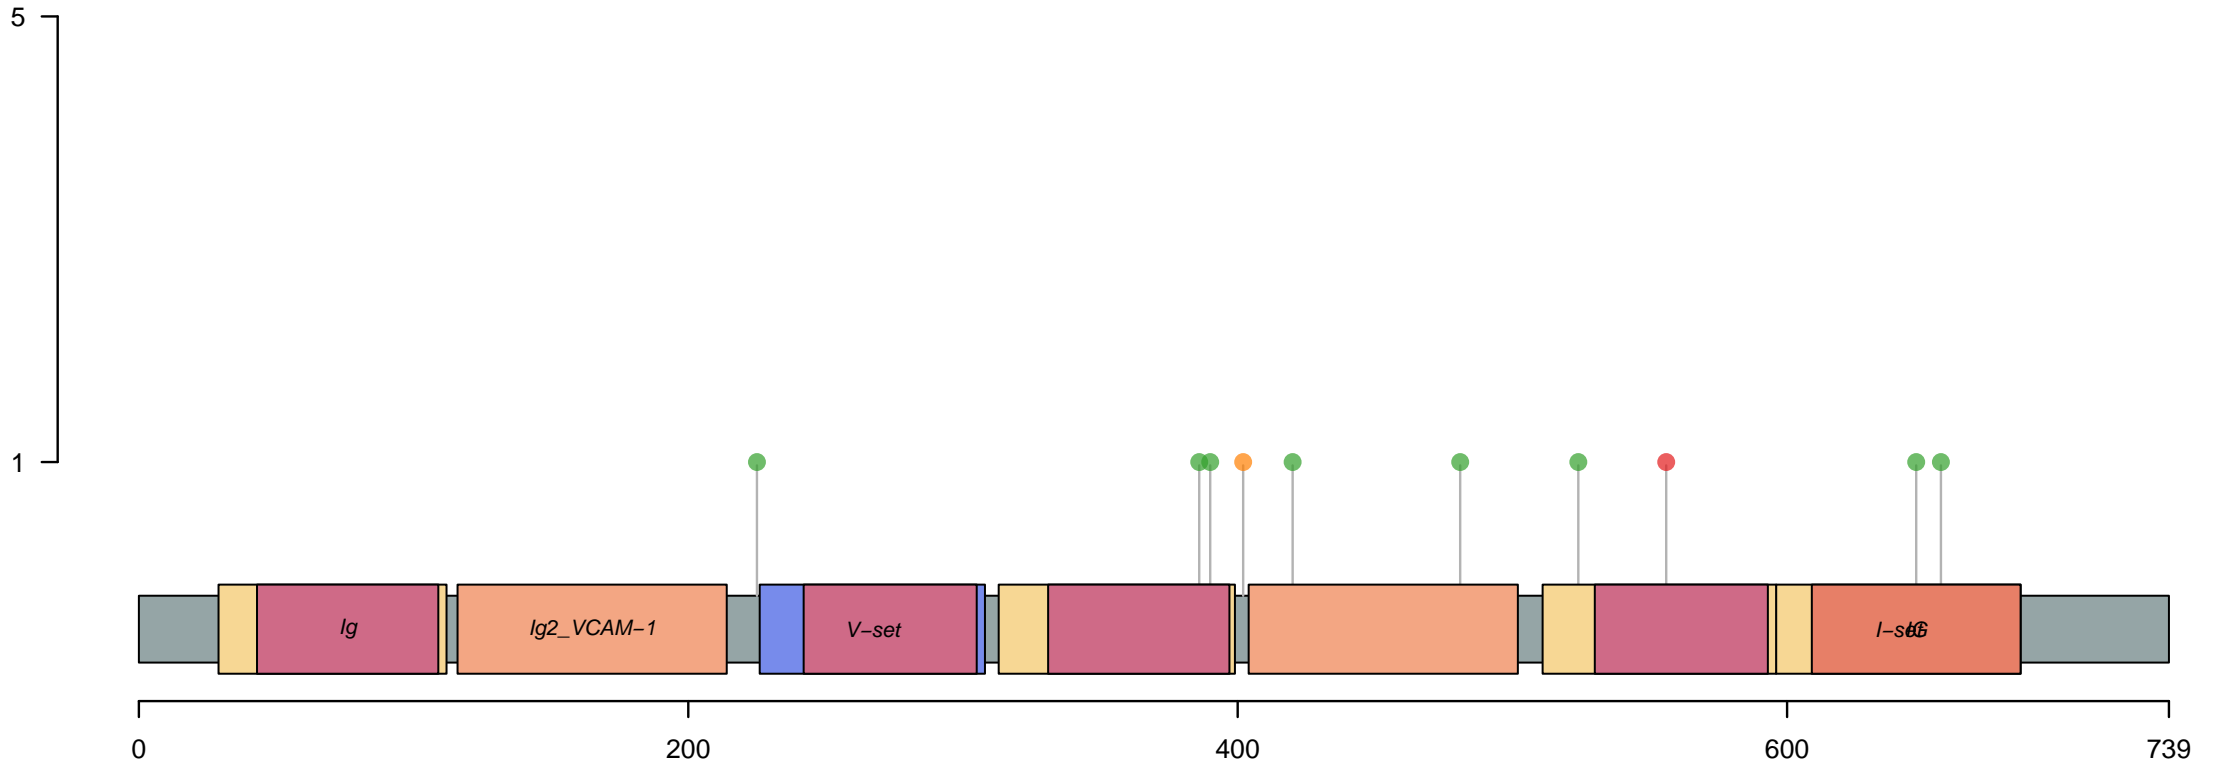

- Missense\_Mutation
- Splice\_Site
- Nonsense\_Mutation

Supplement: Supplementary file 29 [file 977cade7e3a206ee18427df7.pdf]

TSPYL2 : [Somatic Mutation Rate: 1.07%]

NM\_022117

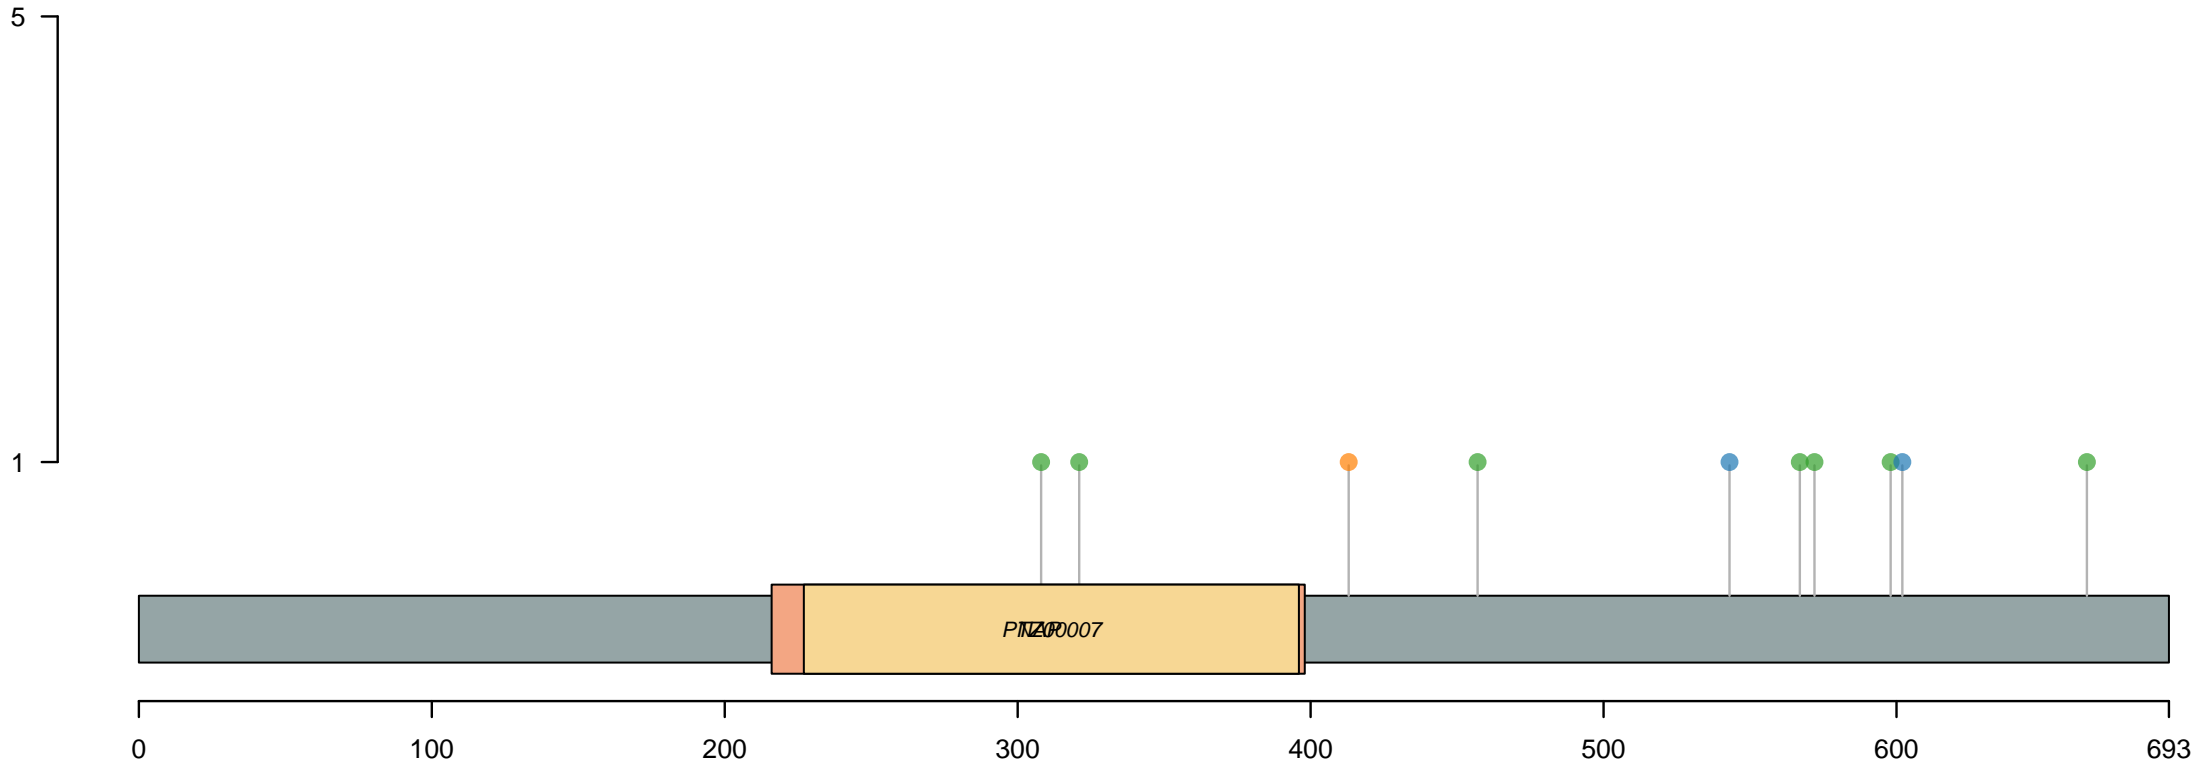

- Missense\_Mutation
- Splice\_Site
- Frame\_Shift\_Del

Supplement: Supplementary file 32 [file b68b7678d02a1c2dbc349a2b.pdf]

TRABD2A : [Somatic Mutation Rate: 1.07%]

NM\_001080824

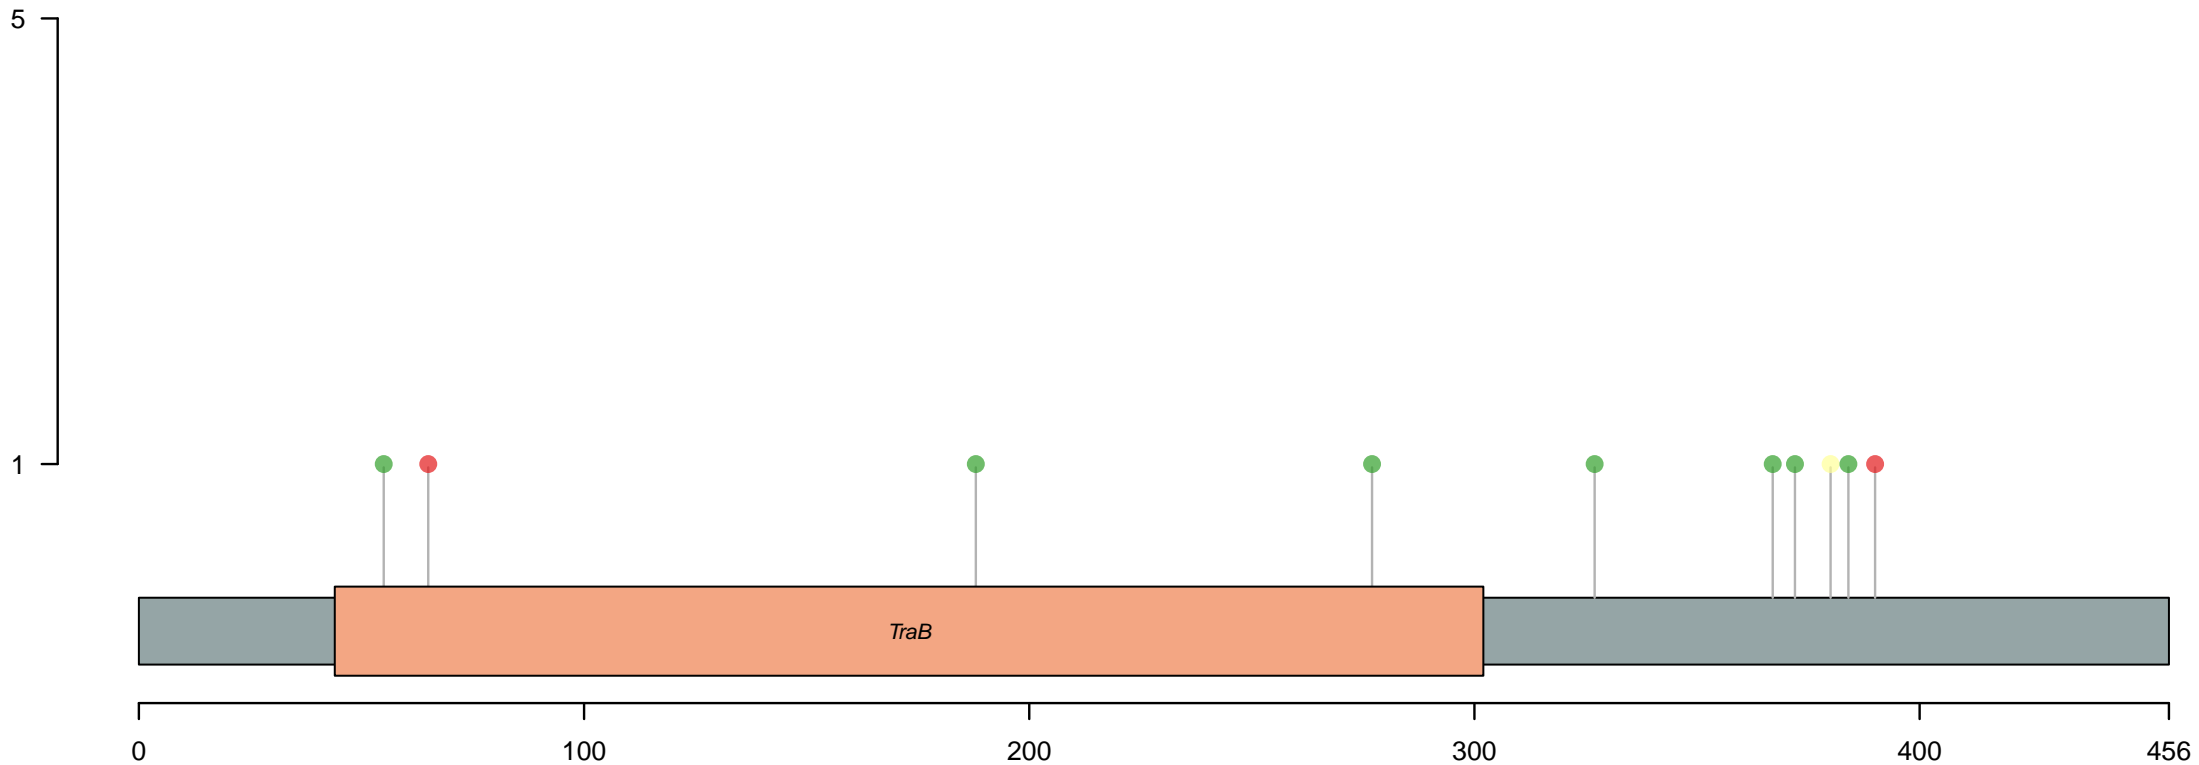

- Missense\_Mutation
- Nonsense\_Mutation
- In\_Frame\_Del

Supplement: Supplementary file 33 [file bd8219ccde7e84d41a9067e3.pdf]

PPP2R5C : [Somatic Mutation Rate: 0.64%]

NM\_001161725

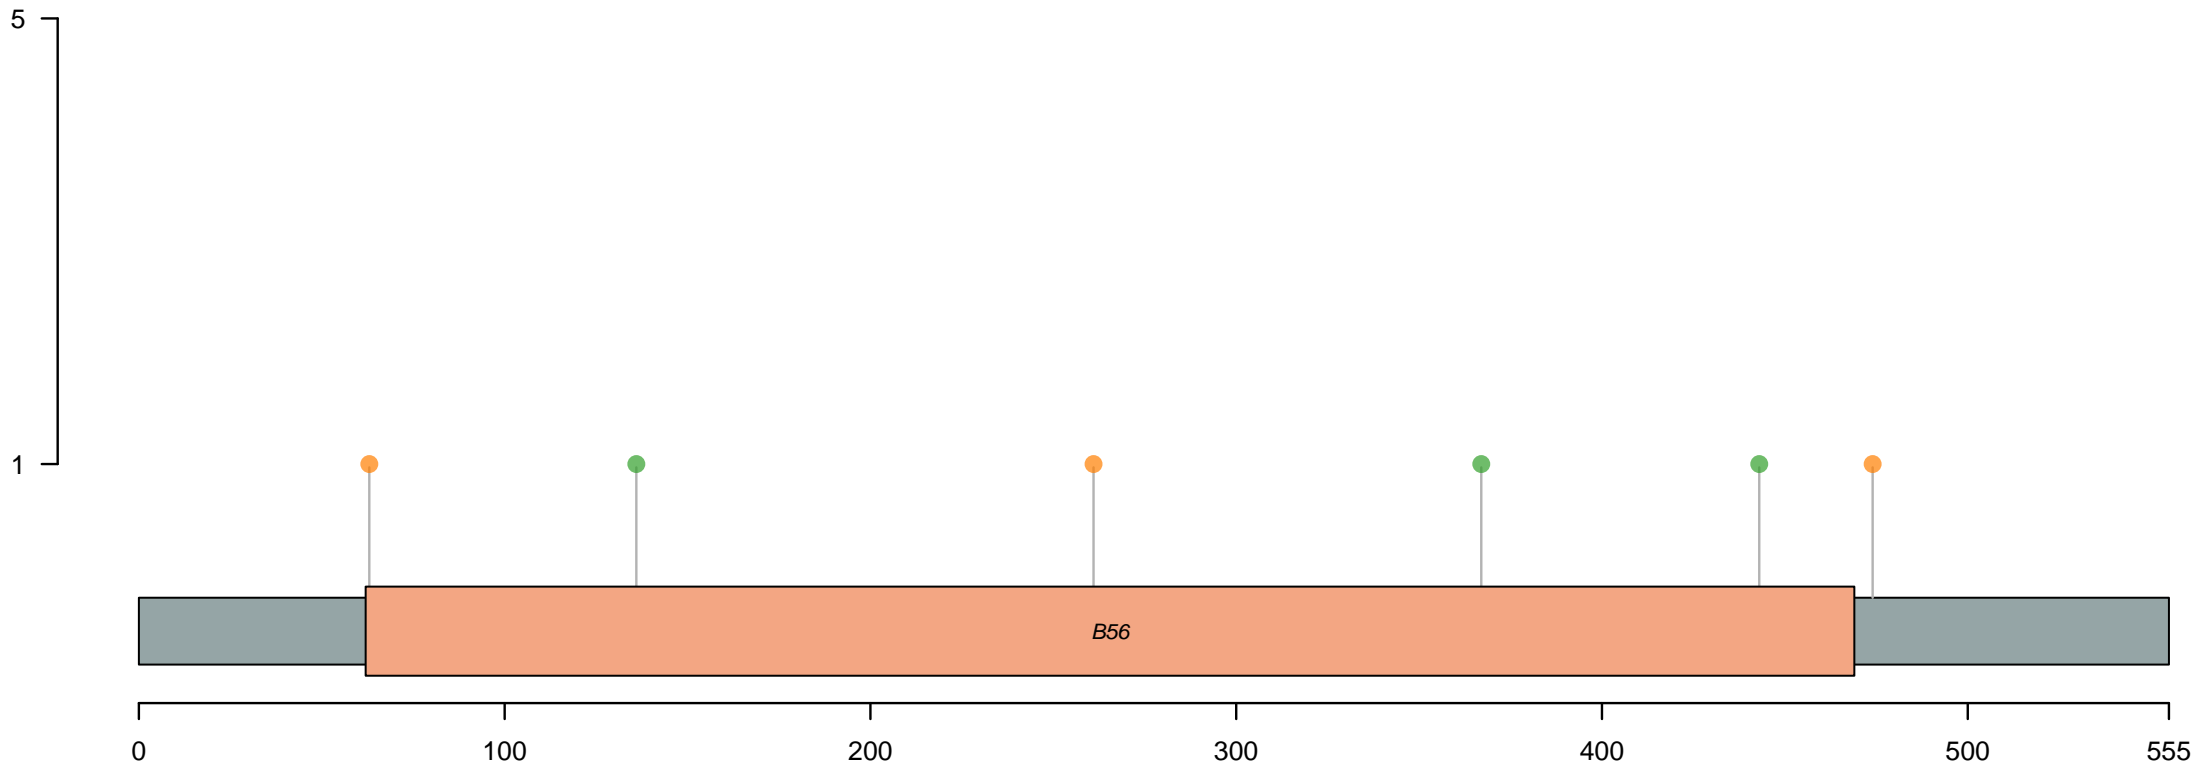

● Splice\_Site

● Missense\_Mutation

Supplement: Supplementary file 34 [file c12b24de5bef466a3a974127.pdf]

LIPN : [Somatic Mutation Rate: 0.86%]

NM\_001102469

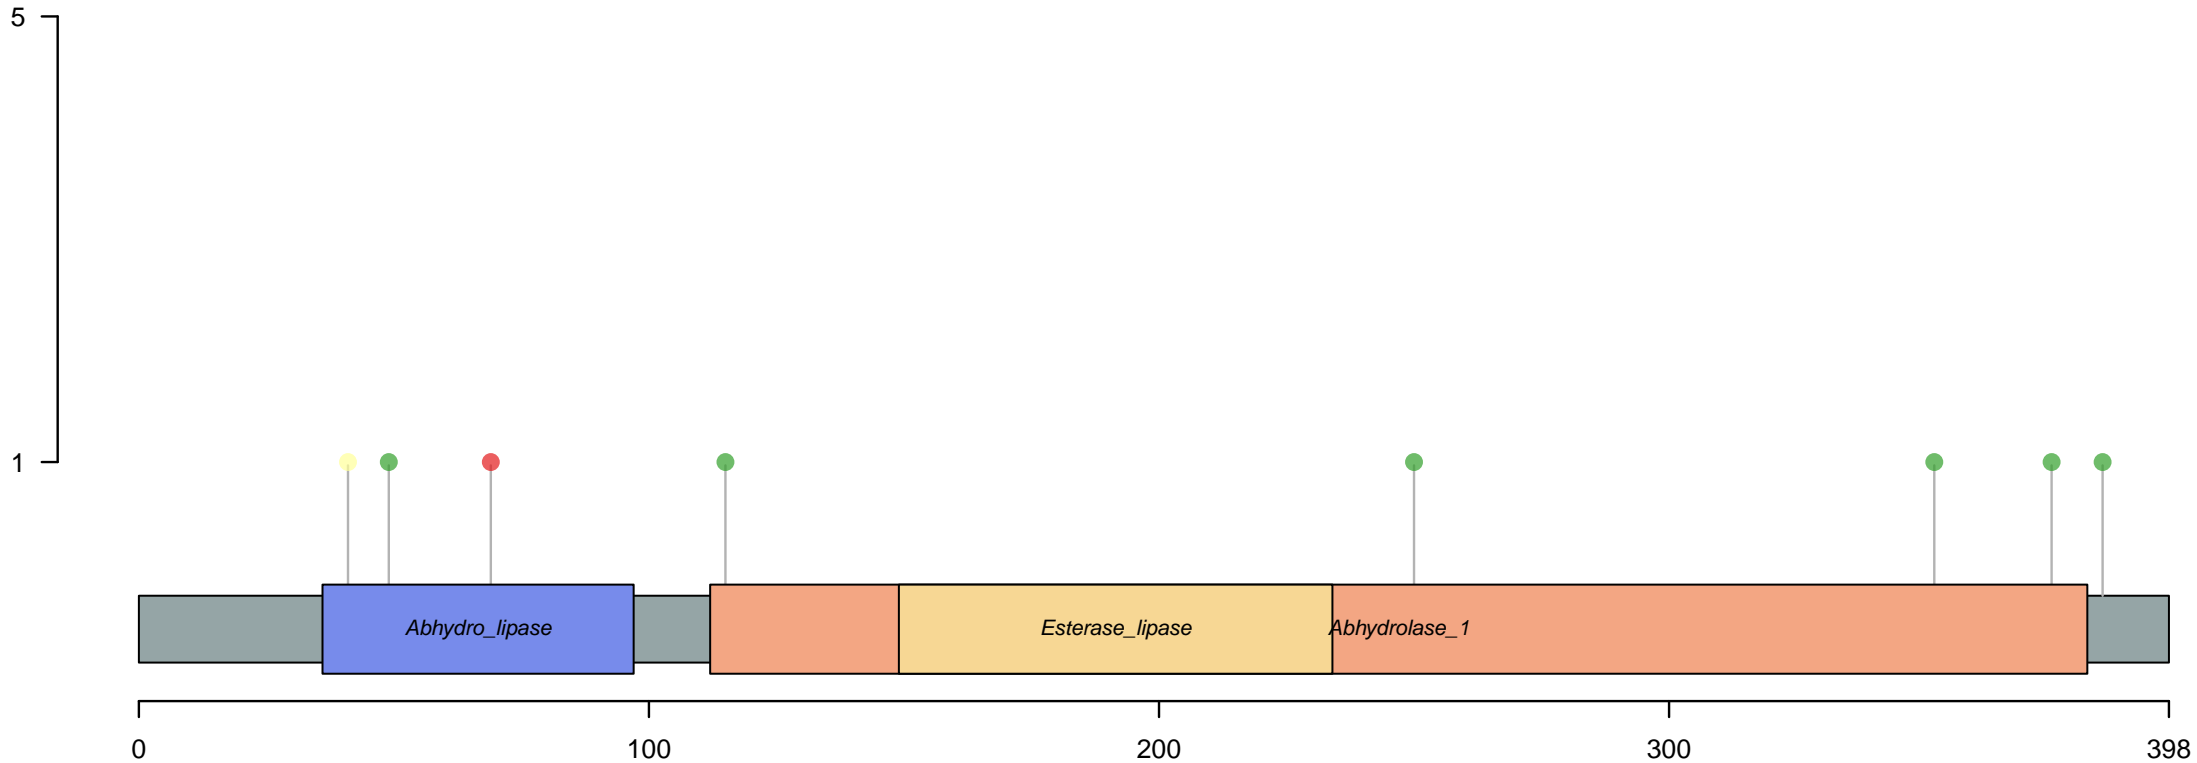

- In\_Frame\_Del
- Missense\_Mutation
- Nonsense\_Mutation

Supplement: Supplementary file 36 [file d898bcf1cebfd63e2b613420.pdf]

SLC9A2 : [Somatic Mutation Rate: 1.18%]  
NM\_003048

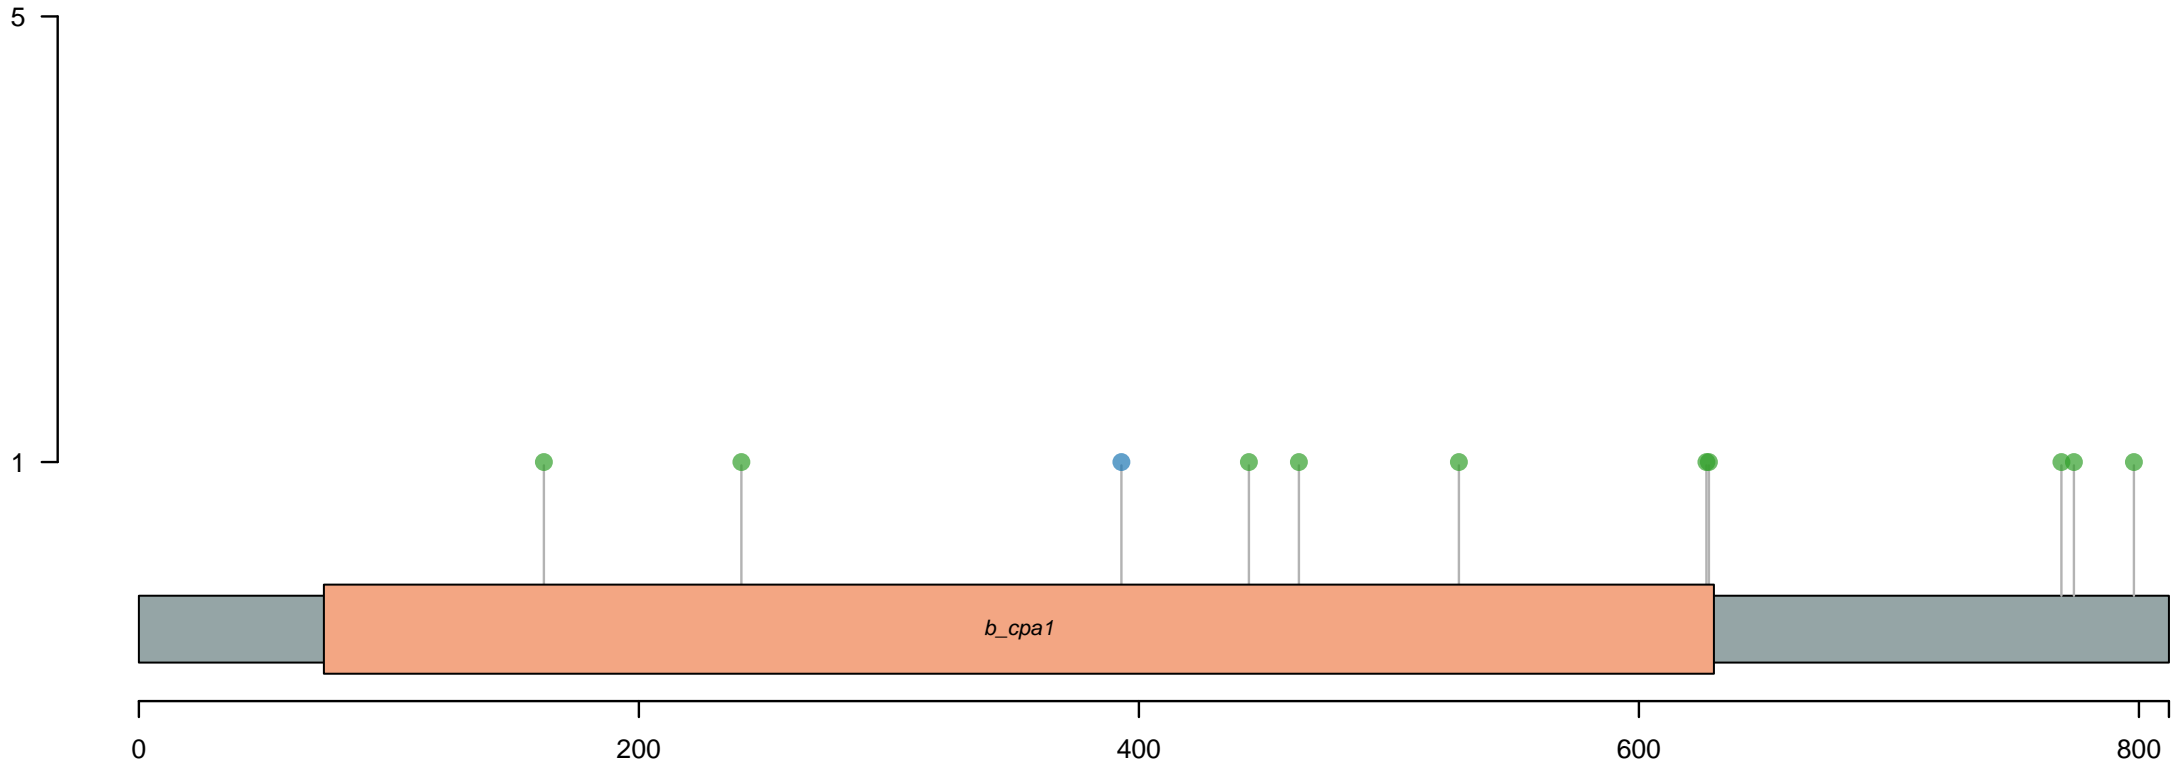

- Missense\_Mutation
- Frame\_Shift\_Del

Supplement: Supplementary file 37 [file e4aded5913900e0e82f48110.pdf]

WNK1 : [Somatic Mutation Rate: 1.39%]

NM\_001184985

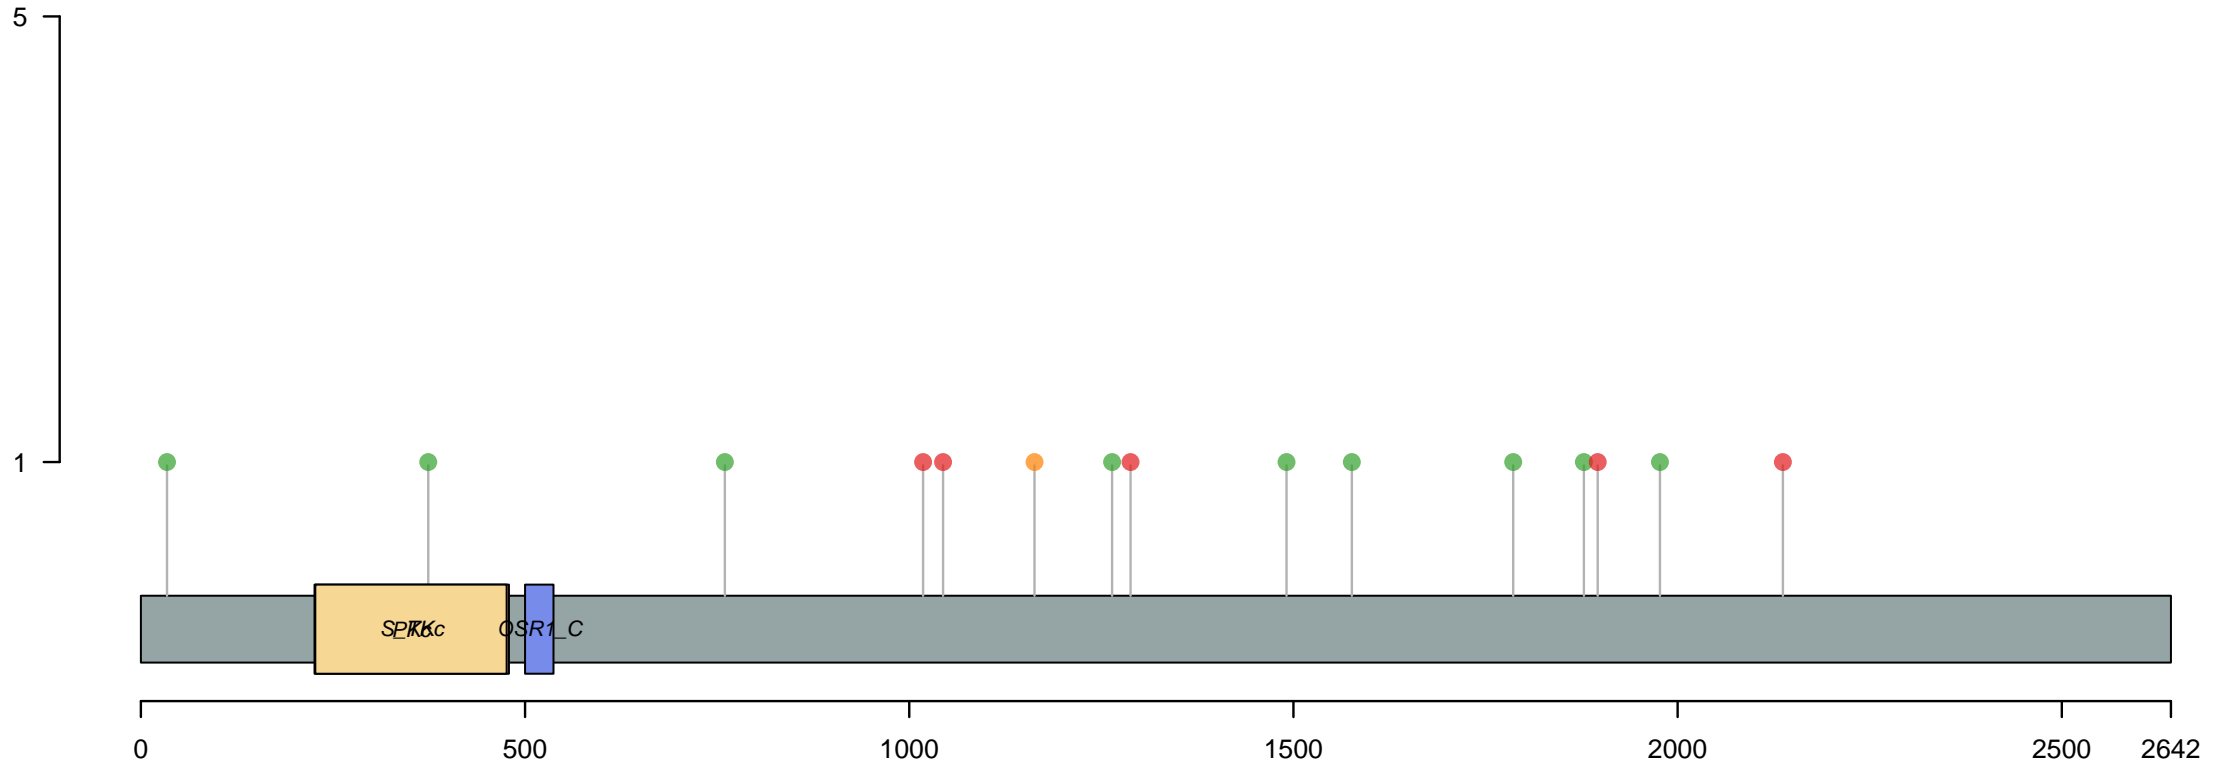

- Missense\_Mutation
- Nonsense\_Mutation
- Splice\_Site

Supplement: Supplementary file 38 [file e64340af51273aaec326a857.pdf]

*ITGB4* : [Somatic Mutation Rate: 1.07%]

NM\_000213

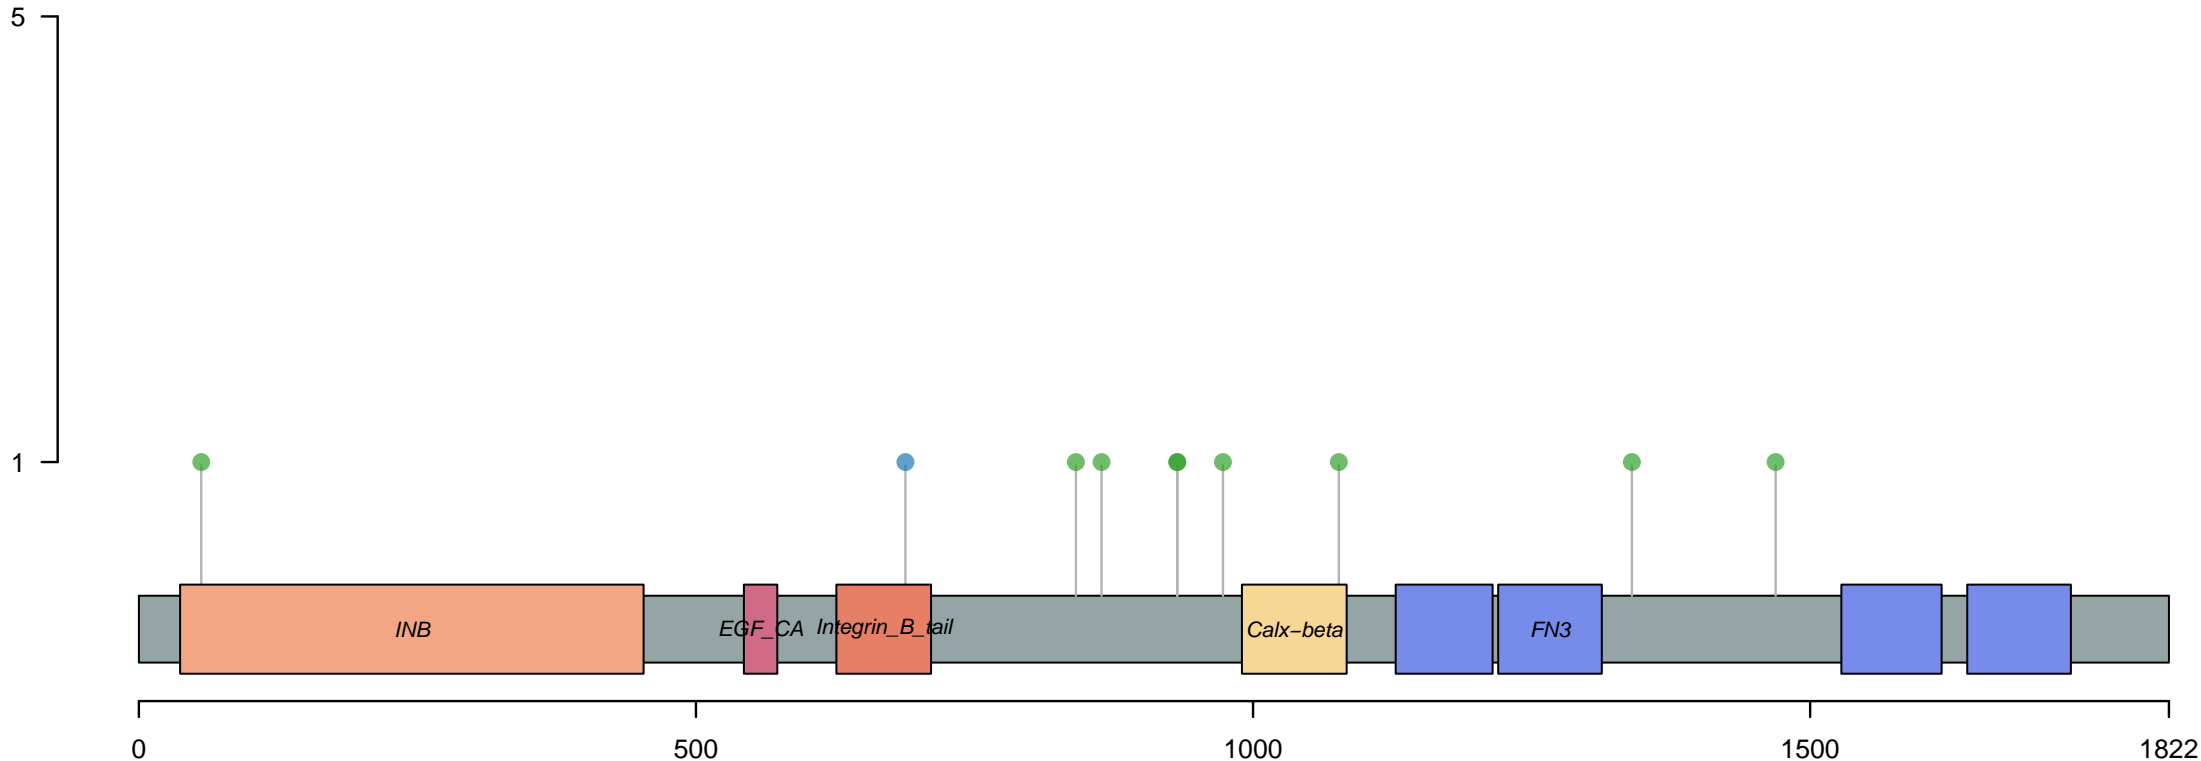

- Missense\_Mutation
- Frame\_Shift\_Del

Supplement: Supplementary file 39 [file f34efd19acd5f28474039206.pdf]
